$\gamma$ HV68 infection activates pol III promoters

**Lytic infection with murine gammaherpesvirus 68 activates host and viral RNA polymerase III promoters and enhances non-coding RNA expression**

Ashley N. Knox,<sup>a</sup> Alice Mueller,<sup>b</sup> Eva M. Medina,<sup>a</sup> Eric T. Clambey,<sup>c</sup> Linda F. van Dyk<sup>a#</sup>

<sup>a</sup> Department of Immunology and Microbiology, University of Colorado Anschutz Medical Campus, Aurora, Colorado, USA

<sup>b</sup> Department of Molecular, Cellular, and Developmental Biology, University of Colorado, Boulder, Colorado, USA

<sup>c</sup> Department of Anesthesiology, University of Colorado Anschutz Medical Campus, Aurora, Colorado, USA

Running Title:  $\gamma$ HV68 infection activates pol III promoters

#Address correspondence to Linda van Dyk, [linda.vandyk@cuanschutz.edu](mailto:linda.vandyk@cuanschutz.edu)

Abstract: 239 words

Importance: 136 words

Text: 7945 words

## $\gamma$ HV68 infection activates pol III promoters

### **ABSTRACT**

RNA polymerase III (pol III) transcribes multiple non-coding (nc) RNAs that are essential for cellular function. Pol III-dependent transcription is also engaged during certain viral infections, including the gammaherpesviruses ( $\gamma$ HVs), where pol III-dependent viral ncRNAs promote pathogenesis. Additionally, several host ncRNAs are upregulated during  $\gamma$ HV infection and play integral roles in pathogenesis by facilitating viral establishment and gene expression. Here, we sought to investigate how pol III promoters and transcripts are regulated during gammaherpesvirus infection using the murine gammaherpesvirus 68 ( $\gamma$ HV68) system. To compare the transcription of host and viral pol III-dependent ncRNAs, we analyzed a series of pol III promoters for host and viral ncRNAs using a luciferase reporter optimized to measure pol III activity. We measured promoter activity from the reporter gene at the translation level via luciferase activity and at the transcription level via RT-qPCR. We further measured endogenous ncRNA expression at single cell-resolution by flow cytometry. These studies demonstrated that lytic infection with  $\gamma$ HV68 increased the transcription from multiple host and viral pol III promoters, and further identified the ability of accessory sequences to influence both baseline and inducible promoter activity after infection. RNA flow cytometry revealed the induction of endogenous pol III-derived ncRNAs that tightly correlated with viral gene expression. These studies highlight how lytic gammaherpesvirus infection alters the transcriptional landscape of host cells to increase pol III-derived RNAs, a process that may further modify cellular function and enhance viral gene expression and pathogenesis.

### **IMPORTANCE**

Gammaherpesviruses are a prime example of how viruses can alter the host transcriptional landscape to establish infection. Despite major insights into how these viruses modify RNA polymerase II-dependent generation of messenger RNAs, how these viruses influence the activity of host RNA polymerase III remains much less clear. Small non-coding RNAs produced by RNA polymerase III are increasingly recognized to play critical regulatory roles in cell biology and virus infection. Studies of RNA polymerase III dependent transcription are complicated by multiple promoter types and diverse RNAs with variable stability and processing requirements. Here, we characterized a reporter system to directly study RNA polymerase III-dependent responses during gammaherpesvirus infection and utilized single-cell flow cytometry-based methods to reveal

$\gamma$ HV68 infection activates pol III promoters

- 27 that gammaherpesvirus lytic replication broadly induces pol III activity to enhance host and viral non-coding RNA  
28 expression within the infected cell.

$\gamma$ HV68 infection activates pol III promoters

## 29 INTRODUCTION

30 Gammaherpesviruses ( $\gamma$ HVs) are large, dsDNA viruses that establish a life-long infection in their hosts,  
31 with long-term latency in lymphocytes (1, 2). The  $\gamma$ HVs include the human pathogens, Epstein-Barr virus (EBV)  
32 and Kaposi's sarcoma-associated herpesvirus (KSHV or HHV-8), and murine gammaherpesvirus 68 ( $\gamma$ HV68 or  
33 MHV-68; ICTV nomenclature *Murid herpesvirus 4*, MuHV-4) (3). These viruses establish a primary lytic infection  
34 in their host that is followed by a prolonged quiescent infection termed latency. Latency is maintained in healthy  
35 individuals by a homeostatic relationship between the virus and the host immune response; if this balance is  
36 disrupted (e.g. by immunosuppression),  $\gamma$ HVs can reactivate from latency and actively replicate. Disruption  
37 between the balance of  $\gamma$ HV infection and host immune control is associated with  $\gamma$ HV multiple pathologies,  
38 including a range of malignancies (4).

39 The  $\gamma$ HVs contain several types of non-coding (nc) RNAs, including nuclear ncRNAs and functional  
40 miRNAs; these diverse RNAs include ncRNAs transcribed by RNA polymerase II (e.g. the KSHV PAN RNA and  
41 the KSHV and EBV miRNAs) or by RNA pol III (e.g. the EBV-encoded small RNAs (EBERs) and the  $\gamma$ HV68  
42 tRNA-miRNA-encoded RNAs (TMERs)) (5-13). Viral ncRNAs are considered to have important host-modulatory  
43 functions, interacting with host proteins and regulating host and viral gene expression. For example, the EBV  
44 EBERs are expressed during latency, and were discovered through their interaction with the host lupus-  
45 associated antigen (La) protein, which putatively mediates EBER interaction with TLR3 (14-17). The EBERs have  
46 further been shown to interact with several host proteins including ribosomal protein L22, protein kinase R (PKR),  
47 and retinoic-acid inducible gene I (RIG-I) (18). These interactions can trigger sustained host innate immune  
48 responses that are implicated in the development of EBV-associated malignancies (16, 19-21).  $\gamma$ HV68, a highly  
49 tractable small animal model of  $\gamma$ HV infection, also encodes several pol III-transcribed ncRNAs known as the  
50 tRNA-miRNA-encoded RNAs (TMERs) (22, 23). The TMERs are dispensable for lytic replication and  
51 establishment of latency; however, these transcripts are required for pathogenesis during acute infection of an  
52 immunocompromised host (7, 24, 25). The TMERs contain bi-functional elements with a tRNA-like structure at  
53 the 5' end and hairpins that are processed into biologically-active miRNAs (7), capable of targeting a number of  
54 RNAs for post-transcriptional regulation (26). Our lab has previously shown that the tRNA-like structure is

## $\gamma$ HV68 infection activates pol III promoters

55 sufficient to rescue pathogenesis of a TMER deficient viral recombinant, suggesting that like the EBERs, the  
56 TMERs may contribute to pathogenesis through their interactions with host proteins (25). Though TMER-host  
57 protein interactions have yet to be fully explored, it is notable that several characteristics of the EBERs, such as  
58 a 5'-triphosphate and 3'-polyU, are imparted by RNA polymerase III (pol III) transcription (27). These motifs can  
59 be recognized by host RNA-binding proteins, such as RIG-I or La, to trigger an innate immune response (16, 20,  
60 27, 28).

61 Pol III is often considered to perform “house-keeping” functions, as it transcribes host genes required for  
62 cell growth and maintenance (e.g. U6 snRNA, tRNAs, and 5S rRNA) (29). Despite this, it is clear that the  $\gamma$ HVs  
63 can usurp pol III-dependent transcription mechanisms for their own purposes. Latent EBV infection has been  
64 shown to upregulate components of pol III and ultimately increase the expression of host pol III transcripts –  
65 particularly vault RNAs – that allow increased establishment of viral infection and gene expression (30-32).  
66 Similarly,  $\gamma$ HV68 infection drives upregulation of host pol III-dependent short-interspersed nuclear element  
67 (SINE) RNAs, which in turn, mediate increased viral gene expression (33-35). Additionally, our lab has reported  
68 that reactivation of a latently-infected  $\gamma$ HV68 cell line results in a rare subset of the population that demonstrates  
69 increased viral transcription and translation, including increased expression of TMERs (36). Notably,  
70 dysregulation of pol III is a common feature of many cancer cells, implicating  $\gamma$ HV infection-driven alteration of  
71 pol III activity as one potential contributor to  $\gamma$ HV-associated malignancies (37). Therefore, understanding how  
72  $\gamma$ HV infection alters pol III activity is integral to elucidating mechanisms of  $\gamma$ HV pathogenesis.

73 The analysis of pol III activity during  $\gamma$ HV infection has been complicated by the nature of pol III-derived  
74 ncRNAs. These transcripts are often short and structured, creating complications in probe specificity to  
75 quantitatively analyze promoter activity/gene expression by conventional means (e.g. northern blot, RT-qPCR).  
76 Probe specificity is also challenging for classes of RNAs with highly conserved promoter features, such as the  
77  $\gamma$ HV68 TMERs or the human tRNAs. However, promoter analysis of the TMERs could reveal rules of  
78 transcription that apply to other conserved and potentially co-regulated ncRNAs, such as the human tRNAs.  
79 Additionally, many pol III-derived ncRNAs may be scarce or abundant so that changes in expression can be  
80 obscured. Therefore, highly sensitive readouts, such as the high dynamic range of luciferase assays or

## $\gamma$ HV68 infection activates pol III promoters

81 quantitative assays with single-cell resolution, offer potential improvement in measuring pol III-derived ncRNA  
82 expression. Single cell RNA flow cytometry allows RNA detection with high specificity without the need for unique  
83 primers and probe, and has the additional benefit of measuring RNA levels in individual cells to reveal fine  
84 fluctuations that may be obscured in bulk analyses.

85 The ideal comparison of promoters allows variation only in the promoter elements coupled to a common  
86 reporter gene and sensitive detection. Traditional analysis of RNA pol II promoter activity has benefitted  
87 significantly from the use of luciferase reporter systems, which provide the advantages of a readout that is high  
88 throughput, has a wide dynamic range for maximal quantitation, and is standardized across varied promoters  
89 and cellular conditions. RNA pol III does not produce coding RNAs in normal biology; however, several studies  
90 have reported the use of luciferase reporters to measure ncRNA derived from pol III or pol I (38, 39). Based on  
91 these studies, we developed a panel of luciferase reporters driven by pol III promoters to determine the efficacy  
92 of a reporter gene approach in analyzing ncRNA promoter activity during viral infection. As with analysis of RNA  
93 pol II reporters, caveats to the enzymatic readout of this system are that it is several steps downstream of RNA  
94 transcription, the efficacy of RNA translation may differ among specific RNAs, and infection may alter translation  
95 in a number of ways yet to be described. However, use of the facile enzymatic readout plus RT-qPCR  
96 quantitation of the reporter RNA allows us to directly compare these measures for highly sensitive quantitative  
97 analysis. As a complementary approach, we quantified ncRNAs expression at the single-cell level in the  
98 presence or absence of virus infection.

99 Due to the importance of  $\gamma$ HV ncRNAs during infection and the unique transcriptional regulation afforded  
100 by RNA pol III, the overall objective of this study was to compare different RNA pol III promoters and their activity  
101 during virus infection using three different methods for sensitive and quantitative analysis. We found that  $\gamma$ HV68  
102 infection upregulates the activity of multiple viral and host pol III promoters, a process further associated with the  
103 induction of pol III-dependent targets. These studies indicate that lytic  $\gamma$ HV infection can broadly enhance RNA  
104 pol III promoter activity to modify the ncRNA landscape of infected cells.

$\gamma$ HV68 infection activates pol III promoters

## RESULTS

RNA polymerase III can transcribe RNA from a variety of gene-internal (type 1 and 2) and gene-external (type 3) promoters (Fig 1A). These promoters contain distinct motifs that determine which transcription factors bind to the promoter to recruit pol III (40). To understand how  $\gamma$ HV lytic replication influenced RNA pol III promoter activity while limiting the confounding factors of the individual RNA primary transcripts and modified or processed products, we sought to make use of a luciferase assay previously used to study pol III promoter activity (41) to study a series of viral and host pol III promoters. We selected the reporter plasmid pNL1.1 (Promega), because NanoLuc luciferase creates a brighter signal, and the protein is smaller than other luciferase proteins (NanoLuc 19.1 kDa and 171 nucleotides; Renilla 36.0 kDa and 312 nucleotides; Firefly 60.6 kDa and 550 nucleotides), which is consistent with pol III processivity of small ncRNAs. Our analysis of the pNL1.1 sequence revealed a pol III termination signal within the luciferase coding gene (TTTT). Therefore, to examine the activity of pol III promoters without the potential for early termination, we introduced silent mutations into the NanoLuc reporter construct to remove the termination signal. This altered vector was named “pNLP3” to reflect that it is a *NanoLuc* reporter optimized for *pol III* (Fig 1B). The human U6 promoter was cloned into both the parental pNL1.1 and the modified pNLP3 to compare the effects of removing the pol III termination signal, with promoter activity measured 24 hours post-infection. We found that removal of the termination signal increased the luciferase output, indicating that there was more read-through of the full NanoLuc gene from pNLP3 (Fig 1B, left). Furthermore, RT-PCR analysis of the NanoLuc transcript transcribed from the U6 promoter in either the pNL1.1 or pNLP3 vector revealed more full-length NanoLuc transcript from the pNLP3 vector (Fig 1B, right). This indicates that the pNLP3 vector allows for optimal pol III transcription of the reporter gene. We therefore used the pNLP3 vector as the backbone for analysis of all other pol III promoters included in this study.

With an optimized pol III reporter construct, we assessed how different pol III promoters respond to  $\gamma$ HV68 infection over time. We first compared the activity of the human U6 (type 3) and  $\gamma$ HV68 TMER1 (type 2) promoters. HEK 293 cells were transfected with pNLP3 vectors containing either the U6 or TMER1 promoter, co-transfected with an SV40 (pol II promoter)-driven Firefly luciferase vector, then infected with  $\gamma$ HV68 (Fig

## $\gamma$ HV68 infection activates pol III promoters

131 1C). Cell lysates were collected every 4 hours for 24 hours post-infection to quantify promoter activity as  
132 defined by NanoLuc luciferase activity. This analysis revealed that  $\gamma$ HV68 infection resulted in a time-  
133 dependent increase in NanoLuc activity for both the U6 and TMER1 promoters (left panel, Fig 1D-1E) relative  
134 to mock-infected samples.  $\gamma$ HV68 infection also resulted in a time-dependent increase in expression of the  
135 control, Firefly luciferase reporter (second panel from left, Fig 1D-1E). The results for dual luciferase assays  
136 are typically reported as relative luminescence units (RLUs), where the reporter luminescence units (LUs) are  
137 normalized to the luminescence units of the control luciferase (i.e., NanoLuc LUs / Firefly LUs). However, since  
138  $\gamma$ HV68 infection simultaneously increased luminescence from both the NanoLuc reporter, and from the control  
139 Firefly reporter, this normalization implied decreased relative U6 promoter activity with infection when we  
140 actually observe an increase in NanoLuc activity (Fig 1D). Clearly, the numerous changes incurred in cells  
141 during viral infection limits our ability to standardize pol III promoter activity relative to a pol II promoter control  
142 (i.e. SV40 promoter); therefore, all subsequent analyses report promoter activity as a fold change in NanoLuc  
143 luminescence comparing mock and  $\gamma$ HV68 infected samples. This allows us to directly compare the effect of  
144 infection on the reporter in related samples. We found that the U6 promoter drives high basal luciferase activity  
145 under mock conditions (left panel, Fig 1D), with a further increase in raw and normalized U6-expressed  
146 NanoLuc LUs throughout infection (Fig 1D). In contrast, the TMER1 promoter was characterized by extremely  
147 low basal luciferase activity (left panel, Fig 1E) in mock conditions; however, this promoter was strongly  
148 induced by infection (Fig 1E). These data suggest that the luciferase assay can be used for analysis of pol III  
149 promoters and show that  $\gamma$ HV68 lytic infection increases the activity of multiple pol III promoter types, with a  
150 more robust induction of the type 2 promoter of TMER1 compared to the U6 promoter.

151 We further analyzed the activity of several other promoter types to assess how they are impacted  
152 during  $\gamma$ HV68 infection. Experiments indicated that  $\gamma$ HV68 infection induced activity from multiple pol III  
153 promoters, including the human U6 and tRNA-Tyr promoters, the EBER1 and EBER2 promoters, and TMER1,  
154 4, and 5 promoters (Fig 2). Though the vaultRNA1-1 and adenovirus VA1 promoters were cloned into the  
155 reporter, there was no detectable activity from these constructs (unpublished data). While viral infection



## $\gamma$ HV68 infection activates pol III promoters

156 induced luciferase activity from all of the examined promoters, the TMER promoters consistently showed the  
157 greatest induction during infection.

158 Because the normal role of pol III is in transcription of non-coding RNAs, we wanted to directly measure  
159 the impact of a pol III specific inhibitor (CAS 577784-91-9) on luciferase activity from the TMER1 promoter  
160 compared to pol II promoters (TK-NanoLuc and SV40-Firefly). We treated cells with 40  $\mu$ M of CAS 577784-91-  
161 9, a drug concentration previously reported in investigation of  $\gamma$ HV68 induction of SINE RNAs (33), prior to  
162 transfection and infection. We found that inhibition of pol III with this drug concentration significantly reduced  
163 the induction of luciferase activity from the TMER1 promoter without toxicity (unpublished data), and reduced  
164 expression of endogenous pol III-transcribed genes during infection (Fig 3A, human pre-tRNA-Tyr-GTA-1-1  
165 and  $\gamma$ HV68 TMER1). Pol III inhibition did not affect an endogenous pol II-transcribed gene (Fig 3A, NFAT5)  
166 and had no consistent effect on the luciferase activity from pol II promoters SV40 and TK (Fig 3B). In contrast,  
167 pol III inhibition led to significant decreases in luciferase activity from six of the seven tested pol III promoters  
168 (Fig 3C), with the exception being the U6 promoter (the only type 1 promoter) which exhibited no decrease in  
169 activity. The apparent resistance of the U6 promoter to inhibition could either be due to the relatively high  
170 activity of the U6 promoter, or to alternate mechanisms of transcription at the U6 promoter (e.g. pol II  
171 recruitment to the promoter (41)) invoked at these inhibitor concentrations. Though these data show pol III  
172 activity was not completely inhibited, we expect that full inhibition of pol III would result in cell death, and  
173 therefore, partial pol III inhibition is ideal for measuring the impact of pol III in this system. These studies  
174 indicate that inhibiting pol III activity consistently impaired induction of luciferase from multiple host and viral pol  
175 III promoters corresponding to the type 2 pol III promoter subtype.

176 We also measured the luciferase RNA expressed from the TK (pol II) and TMER1 (pol III) promoters  
177 during infection with pol III inhibition. When mimicking the transfection conditions used for the dual luciferase  
178 assays with 200 ng transfected DNA, we found no significant difference in the expression of NanoLuc from  
179 either the TK or TMER1 promoters in any of the examined conditions (Fig 3B, C, in blue). However, given that  
180 there is induction of NanoLuc RNA from the TMER1 promoter during infection (Fig 5), we tested whether  
181 increasing the amount of transfected reporter DNA may allow for greater distinction in NanoLuc RNA levels

## $\gamma$ HV68 infection activates pol III promoters

182 under infection and pol III-inhibition conditions. Thus, we repeated these experiments with 2  $\mu$ g of total  
183 transfected DNA. These experiments showed no difference in NanoLuc expressed from the TK promoter  
184 during infection or pol III inhibition as compared to mock. However, there was a significant decrease in  
185 NanoLuc expressed from the TMER1 promoter during infection with pol III inhibition compared to both mock (4-  
186 fold) and to infection (6-fold). These data suggest that the NanoLuc expression from pol III promoters is  
187 dependent on pol III activity.

188 Our analyses to this point indicated that the TMER promoters expressed the highest induction in  
189 luciferase activity during infection; therefore, we compared the sequences of TMER promoters to identify which  
190 features of these promoters could potentially contribute to this strong induction. The initially analyzed TMER  
191 promoters contained the TMER promoter, as well as extended sequence around the minimal promoter  
192 elements (Fig 4A). Considering that the extra sequence included in these “full” promoters may contribute to  
193 infection-induced activity, we created a panel of “minimal” TMER and EBER promoters that contain only the  
194 minimal RNA pol III promoter elements, i.e. the sequence beginning from the A box to the end of the B box (Fig  
195 4A). We initially compared the activity of these promoters under basal (no infection) conditions to calculate the  
196 average RLUs (NanoLuc LU/Firefly LU) in the absence of virus-induced changes. This analysis showed that  
197 U6 was the most active of all pol III promoters under uninfected conditions, followed by the “full” EBER  
198 promoters (Fig 4B). In contrast, “minimal” EBER promoters showed a significant reduction in baseline  
199 luciferase activity. All TMER promoters (full or minimal) appeared similar to the empty vector, that is, to have  
200 virtually no activity under uninfected conditions. We then compared the induction of NanoLuc luciferase activity  
201 between the EBER and TMER minimal and full promoters during infection to determine the role of extended  
202 sequence on promoter activity. As previously described, these constructs were transfected into HEK 293 cells,  
203 then infected with  $\gamma$ HV68. The fold change in NanoLuc activity relative to mock-treated samples was compared  
204 after 24 h of infection (Fig 4C). When we compared the relative inducibility of EBER “full” versus “minimal”  
205 promoters, “minimal” promoters showed greater virus-inducibility. This enhanced inducibility of the “minimal”  
206 EBER promoters likely reflects the reduced basal luminescence from these promoters (Fig 4B). Conversely,  
207 TMER “minimal” promoters displayed a weaker induction during infection than their “full” counterparts,

## $\gamma$ HV68 infection activates pol III promoters

208 suggesting the sequence surrounding the TMER minimal promoters drives stronger expression during  
209 infection. These results indicate that the sequence surrounding minimal pol III promoter elements impacts both  
210 the basal activity and inducibility of these promoters during infection.

211 Luciferase readouts of pol III promoter activity allowed us to uniformly analyze pol III promoter activity.  
212 This assay does not directly measure the level of RNAs, however, instead relying on an enzymatic readout of  
213 luciferase protein activity. To ensure that  $\gamma$ HV68 infection was inducing pol III activity transcriptionally, we used  
214 the same NanoLuc constructs to measure promoter activity at the RNA level by performing RT-qPCR for the  
215 NanoLuc transcript. Following the same protocol as used for the luciferase assays, HEK 293 cells were  
216 transfected with pGL3 and the pNLP3 vector expressed by pol III promoters of interest (as outlined in Fig 1).  
217 Cells were then infected with  $\gamma$ HV68 and RNA was purified from cells 16 or 24 h post-infection. Primers  
218 targeting the NanoLuc gene were used for qPCR following reverse transcription of the RNA. Infection  
219 increased the NanoLuc RNA expression from the U6 and TMER1 promoters, with more modest induction from  
220 the EBER promoters (Fig 5A). These results indicate that  $\gamma$ HV68 infection stimulates pol III-promoter activity  
221 from multiple host and viral promoters, measured at both the transcriptional and translational level. To extend  
222 these findings, we further measured NanoLuc RNA expression from “minimal” or “full” TMER promoters. These  
223 studies demonstrated that  $\gamma$ HV68 infection increased NanoLuc RNA from the “minimal” promoter relative to  
224 mock infected samples, with further RNA induction from the “full” TMER promoter (Fig 5B). These results  
225 strongly suggest that the NanoLuc reporter assay serves as a faithful readout for pol III-dependent  
226 transcription, quantified at both the RNA and protein level. These findings also emphasize that sequences  
227 outside of the minimal TMER promoters contribute to increased expression during infection.

228  $\gamma$ HV lytic replication critically depends on viral DNA replication and late gene transcription, processes  
229 that are inhibited by phosphonoacetic acid (PAA) (42, 43). We therefore tested the impact of PAA on virus-  
230 induced pol III induction. To do this, HEK 293 cells were transfected with the pol III-driven NanoLuc constructs  
231 and infected as before, with one set of samples receiving PAA treatment (200 $\mu$ g/mL) after 1 h of viral  
232 inoculation. PAA treatment was consistently associated with increase luciferase enzymatic activity, with PAA-

## $\gamma$ HV68 infection activates pol III promoters

233 treated  $\gamma$ HV68-infected cultures characterized by a greater apparent induction of luciferase activity compared  
234 to  $\gamma$ HV68-infected cultures alone. This PAA-driven enhancement of luciferase activity was observed for  
235 multiple pol III promoters, including U6, TMER1, 4 and 5, and EBER 1 and 2 (Fig 6A). To determine if this  
236 effect was also observed at the transcriptional level, cells were transfected and infected as before. RNA was  
237 isolated 16 h post-infection and RT-qPCR was performed to detect the NanoLuc transcript. Notably, treatment  
238 with PAA during  $\gamma$ HV68 infection had no impact on the induction of NanoLuc RNA compared to untreated  
239 infected cells, indicating that viral DNA replication and late gene synthesis was not required for pol III induction  
240 (Fig 6B). Effectiveness of the PAA treatment was confirmed by measuring expression of a viral late gene, gB  
241 (Fig 6C). The increase in luciferase activity following PAA treatment, with minimal impact on NanoLuc RNA,  
242 strongly suggests that PAA treatment enhanced the translational output from the promoters tested. These data  
243 suggest that viral late gene expression plays an additional role in translation that is not seen at the  
244 transcriptional level, a phenomenon independent of pol III promoter activity.

245         Given the reported relationship between the NF- $\kappa$ B pathway and the expression of pol III-dependent  
246 transcripts (30), we analyzed the effect of NF- $\kappa$ B activation or inhibition on the activity of the U6 and TMER1  
247 promoters via luciferase activity. First, we measured induction of an NF- $\kappa$ B reporter plasmid following treatment  
248 with either TNF $\alpha$ , a known inducer of the NF- $\kappa$ B pathway, or following  $\gamma$ HV68 infection. Whereas TNF $\alpha$   
249 induced NF- $\kappa$ B reporter activity at 4 and 24 hours post-treatment,  $\gamma$ HV68 infection had no measurable impact  
250 on expression from the NF- $\kappa$ B reporter (Fig 6D). Next, we analyzed the impact of NF- $\kappa$ B manipulation on pol III  
251 promoter activity. Treating cells with TNF $\alpha$  modestly increased U6 promoter activity, albeit to a lesser extent  
252 than  $\gamma$ HV68 infection, while TMER1 promoter activity was not affected by TNF $\alpha$  treatment (Fig 6D). Inhibition of  
253 NF- $\kappa$ B with the BAY 11-7082 (BAY 11) compound increased U6-expressed luciferase activity in virus infected  
254 conditions, yet had no significant impact on TMER1 promoter activity after infection (Fig 6E). This indicates a  
255 potential role of NF- $\kappa$ B in inhibiting pol III promoter activity during infection; however, this effect is only  
256 observed in the case of a gene-external (i.e. type 3) promoter. Ultimately, these data do not support a

## $\gamma$ HV68 infection activates pol III promoters

257 significant role of the NF- $\kappa$ B pathway in the observed induction of pol III promoter activity after  $\gamma$ HV68 infection  
258 in these culture conditions.

259 The NanoLuc-expressing constructs allowed us to measure promoter activity using a reporter system  
260 including a shared readout that minimizes confounding factors of RNA sequence/structure/stability, and our  
261 analysis of pol III promoter activity suggested a general induction during infection. However, a previous report  
262 suggested that only a subset of host pol III-transcribed genes – the SINE RNAs – are increased during lytic  
263  $\gamma$ HV68 infection of NIH3T3 cells and *in vivo* infections of C57BL/6 mice (33). While our reporter studies rely on  
264 cell systems that can be easily transfected with reporter DNA, we wanted to quantify the impact of  $\gamma$ HV68  
265 infection on the abundance of endogenous murine and viral pol III RNAs, yet avoid challenges in PCR  
266 amplification, unique primer/probe designs, and bulk analysis. In order to accomplish this, we made use of the  
267 PrimeFlow assay system, a sensitive and robust fluorescent *in situ* hybridization assay, combined with  
268 multiparameter flow cytometry. This system quantifies steady-state RNA expression at the single-cell level  
269 using direct probe hybridization to endogenous RNAs, with sensitivity provided by amplification based on probe  
270 stacking rather than PCR and primers. For this analysis, murine fibroblast cells (3T12) were mock-treated,  
271 infected with wild-type (WT)  $\gamma$ HV68, or infected with an EBER-knock in (EBER-KI. $\gamma$ HV68) recombinant  $\gamma$ HV68  
272 that lacks the TMERs and instead contains insertion of the EBV EBERs into the TMER locus. EBER-KI. $\gamma$ HV68  
273 was competent for viral replication (manuscript in progress). 3T12 cells were infected with an MOI of 1 and  
274 harvested at 16 h post-infection, conditions that result in a mixed population of virally infected and uninfected  
275 cells. Cells were then queried with fluorescent probes to detect viral (the  $\gamma$ HV68 TMERs or the EBV EBERs)  
276 and host ncRNAs (U6 snRNA or 4.5 rRNA, the murine equivalent of human 5S rRNA). This analysis allowed a  
277 comparison of host ncRNA expression as a function of viral ncRNA expression, comparing cells with or without  
278 virus ncRNA expression. Gating schemes for doublet exclusion and probe specificity are shown in Figure 7.  
279 Notably, probes for the TMERs and EBERs were specific for their intended targets, with no detectable TMER  
280 or EBER signal in mock-infected samples, TMER+ cells only present in WT  $\gamma$ HV68 infected samples, and  
281 EBER+ cells only present in EBER-KI. $\gamma$ HV68 infected samples (Fig 8E). We next compared the relative

## $\gamma$ HV68 infection activates pol III promoters

282 expression of the U6 (Fig 8A-B) and 4.5S ncRNAs (Fig 8C-D) between cells with active viral RNA expression  
283 versus those cells that did not express these viral ncRNAs. Analysis of the geometric mean fluorescence  
284 intensity (gMFI) for the U6 snRNA and 4.5 rRNA probes revealed increased expression of U6 and 4.5 rRNA  
285 ncRNAs in virally infected cells (i.e. TMER+ or EBER+) compared to uninfected cells (TMER- or EBER-) (Fig  
286 8F-G). These data demonstrate an increase in host pol III-transcribed ncRNAs in  $\gamma$ HV68-infected cells and  
287 emphasize the benefit of single-cell analysis to quantify endogenous ncRNA expression during virus infection.

288 The above analysis established a correlation between expression of viral and host ncRNAs at the  
289 single-cell level, but raised the potential that detection of endogenous viral ncRNAs could bias our analysis to  
290 cells with higher pol III activity independent of viral effects. To address this concern, we repeated the analysis  
291 with another, pol III-independent read-out of infection, detection of the pol II-dependent  $\gamma$ HV68 ORF18 RNA.  
292 Cells were treated as before, with the modification that they were infected at an MOI of 5 rather than 1 so that  
293 differences between infected and non-infected cells were exaggerated. To simplify the RNA probe panel, and  
294 to fortify previous data, we focused on the U6 snRNA as a host measure of pol III activity. Infected cells were  
295 defined as ORF18 RNA positive, as well as TMER (Fig 9A) or EBER (Fig 9B) positive for WT and EBER-KI  
296  $\gamma$ HV68 infection, respectively. This analysis identified several populations that could be distinguished by  
297 different expression levels (negative, mid or high expression) for either ORF18 or the viral ncRNAs (Fig 9C-D).  
298 Within each ORF18-defined population, we calculated the gMFI for either the TMERs/EBERs (Fig 9E) or U6  
299 snRNA (Fig 9F). ORF18 RNA<sup>high</sup> cells had the highest expression of the TMERs, in WT infected samples, and  
300 the EBERs, in EBER-KI infected samples compared to ORF18 RNA<sup>mid</sup> or ORF18 negative cells (Fig 9E).  
301 Notably, virally-infected ORF18 RNA<sup>high</sup> cells from either WT or EBER-KI  $\gamma$ HV68 infection were also  
302 characterized by increased U6 expression relative to uninfected, ORF18 negative cells in the same cultures  
303 (Fig. 9F). Consistent with our previous observations, U6 RNA gMFI was highest in cells with highest  
304 expression of either the TMERs or EBERs (Fig 9G). These data demonstrate that virally infected cultures are  
305 characterized by variation in ncRNA expression between individual cells, and that cells with abundant virus  
306 transcription are further characterized by increased host and viral ncRNA expression.

$\gamma$ HV68 infection activates pol III promoters

## DISCUSSION

While  $\gamma$ HV infection is known to alter expression of host genes, and viral ncRNAs are integral for pathogenesis, the transcriptional regulation of these ncRNAs has remained unclear. Here, we propose that different pol III promoter types allow for distinct means for transcriptional regulation during infection. This study focused on the impact of  $\gamma$ HV68 lytic replication on pol III promoter activity. To measure pol III activity, we used three highly-sensitive methods, two of which were based on a reporter gene and one method based on measuring authentic RNAs. Though these methods each have different advantages and disadvantages, they all indicate that lytic infection drives a general upregulation of promoter activity across multiple host and viral pol III-dependent transcripts, as shown by upregulation of both luciferase activity and luciferase RNA expression, as well as increased expression of endogenous transcripts as measured by flow cytometric analysis of pol III RNAs. Our studies further reveal distinct effects of specific promoters and promoter features. These findings emphasize the utility of the modified NanoLuc luciferase system to analyze pol III promoter activity, and provide clear evidence for pol III promoters with large differences in basal and inducible promoter activity. They further emphasize the capacity of  $\gamma$ HV lytic infection to modify pol III-dependent transcriptional machinery in infected cells, a process that likely facilitates productive virus replication (33). At this time, it remains unknown whether pol III machinery or transcription is altered during  $\gamma$ HV68 latent infection or reactivation from latency.

Our use of a luciferase reporter to measure the activity of pol III promoters allowed us to directly compare the functional activity of multiple pol III promoters in a high-throughput assay while minimizing potential differences that may arise due to ncRNA sequence, structure, or stability. While these assays used NanoLuc RNA and protein as a standard platform for analysis, an important caveat of this analysis is that many pol III promoters are gene-internal. Based on this, the resulting transcript is comprised of a hybrid of at least the minimal pol III promoter elements (i.e. the A and B box) directly fused upstream of the NanoLuc RNA, creating a hybrid RNA that is not 100% identical between constructs. Though pol III promoters conventionally drive expression of non-coding RNAs, there is clear precedent that pol III can transcribe translation-competent RNA (44, 45), and luciferase reporters have been used for high throughput and unbiased analysis of pol III

## $\gamma$ HV68 infection activates pol III promoters

333 promoter activity (38, 46). Inspired by these studies, we cloned several host and viral ncRNA promoters into a  
334 NanoLuc luciferase reporter to measure their activity during lytic  $\gamma$ HV68 infection. We chose the NanoLuc  
335 luciferase as our reporter due to the small size and high activity, which is consistent with pol III transcriptional  
336 capacity and measurement of genes that may be expressed at a low level. To further enhance the robustness  
337 of this reporter, we identified and removed a pol III termination sequence within the NanoLuc gene which  
338 approximately doubled luciferase reporter activity. Though pol III transcription should theoretically be  
339 terminated in the original NanoLuc reporter, pol III read-through of termination signals has been reported (47).  
340 In total, use of the modified NanoLuc reporter construct afforded a sensitive and robust readout for assessing  
341 pol III promoter activity.

342 Through use of this pol III reporter assay, we found that  $\gamma$ HV68 infection increased promoter activity  
343 across a range of host and viral pol III promoters as measured by both luciferase activity and reporter RNA  
344 abundance. Pol III transcription from these promoters was confirmed through treatment with a pol III specific  
345 inhibitor (CAS 577784-91-9). These results demonstrate that virus induction of pol III promoters is dependent  
346 on RNA polymerase III, either through direct or indirect means. Interestingly, the consequence/magnitude of  
347 induction elicited by infection varied between promoters. For example, the U6 promoter conveyed high basal  
348 activity, with infection resulting in a modest induction of U6 promoter activity. Conversely, the TMER promoters  
349 exhibited extremely low basal activity in mock-infected conditions, with dramatic induction after  $\gamma$ HV68  
350 infection. The inducibility of the TMERs was further enhanced by accessory sequences outside of the minimal  
351 A and B box elements. One explanation for this enhanced induction is that these extended sequences may  
352 contain additional transcriptional elements that are integral to the promoter itself. While formally possible, it is  
353 notable that accessory sequences across the TMERs are not conserved (6, 22, 23). An alternate explanation  
354 for the enhanced activity of the full TMER promoters is that inclusion of the extended sequence includes the  
355 full tRNA-like structure of the TMER genes (Fig 4A). It is interesting to speculate that this tRNA-like structure  
356 could either lend greater stability to transcripts, or protect the transcripts from degradation by host  
357 exonucleases or the viral endonuclease, muSOX (48). Although pol III transcription is frequently associated  
358 with the transcription of housekeeping ncRNAs, there is clear precedent that pol III can also participate in



## $\gamma$ HV68 infection activates pol III promoters

359 inducible gene expression (e.g.  $\gamma$ HV68-induced expression of SINEs) (33, 34). Whether the TMERs have  
360 conserved regulatory mechanisms with host inducible ncRNAs is currently unknown, however, the TMERs  
361 share promoter similarity to the SINEs (type 2, gene internal).

362 Our studies demonstrated that infection increased NanoLuc expression at both the RNA and protein  
363 activity level, indicating that virus infection increased pol III promoter activity and not some secondary  
364 measurement. While we saw broad induction of luciferase activity across pol II and pol III promoters, induction  
365 of activity from pol III promoters was inhibited by a pol III-inhibitor, consistent with a model that these  
366 promoters are recruiting pol III to transcribe translation-competent RNA. Notably, induction of the reporter RNA  
367 as measured by RT-qPCR was specific to a pol III promoter (TMER1), and no significant induction was seen  
368 from a pol II promoter (TK, Fig 3B). This suggests possible caveats in the induction we measure from  
369 luciferase activity vs. luciferase RNA. A difference in reporter protein activity vs. transcript abundance was also  
370 seen when we inhibit viral late gene expression. Unexpectedly, inhibition of viral late gene expression with PAA  
371 resulted in increased luciferase activity from nearly all of the promoters examined – this phenomenon was only  
372 seen at the level of NanoLuc protein activity, not at the level of NanoLuc RNA. The ability of PAA to enhance  
373 NanoLuc protein activity, with no commensurate change in RNA expression, suggests that viral late genes may  
374 have a potential role in tempering translation. Together with the general induction of luciferase activity seen  
375 during infection, these data suggest that viral induction of gene expression may be occurring at both the  
376 transcriptional and translational level. Infection may induce expression of pol III-derived reporter transcripts  
377 (RNA) and also increase general translation (luciferase activity), leading to a compound effect when we  
378 measure reporter protein activity. Manipulation of host translational machinery by the herpesviruses is a  
379 common strategy that is required for optimal virus replication and the production of virus progeny (49).

380 While experiments with the NanoLuc reporter constructs indicated a general induction in the activity of  
381 the observed pol III promoters, the levels of induction varied by promoter type. Interestingly, promoters with  
382 upstream elements (U6, EBER1, and EBER2) displayed the highest level of basal activity in mock conditions  
383 and the lowest level of virus-mediated induction of luciferase activity, while gene-internal type 2 promoters had  
384 the lowest basal activity and highest induction (Fig 2). This is likely not due to promoters with gene external

## $\gamma$ HV68 infection activates pol III promoters

385 elements reaching the limit of detection of the luciferase assay, as demonstrated by the increased induction  
386 seen with PAA treatment (Fig 6). Notably, the luciferase activity expressed from the U6 promoter was not  
387 significantly impacted by pol III inhibition, while all other pol III promoters showed decreased activity (Fig 3C).  
388 Among the promoters with external elements, the U6 promoter has the highest induction of NanoLuc  
389 expression when measured at the RNA level and the EBERs had a relatively low induction, with the gene-  
390 internal TMERs moderately induced (Fig 5). The inhibitors used in this project also appear to have promoter-  
391 specific effects, with NF- $\kappa$ B modulation altering the output from the type 1 U6 promoters but not the type 2  
392 TMER promoter (Fig 6). Though all transcripts are transcribed by pol III, these data indicate varying induction  
393 of the different promoters, with varying abilities for the resulting transcripts to be translated into functional  
394 proteins. As evidenced by the U6 promoter, the external elements of type 1 pol III promoters seem to drive  
395 unique responses compared to other pol III promoters and these unique characteristics must be kept in mind  
396 when analyzing different promoter types.

397       Due to the possibility that viral infection has unique effects on transfected plasmids, we complemented  
398 our reporter studies with a highly sensitive analysis of endogenous and viral gene expression using the  
399 PrimeFlow assay to quantify endogenous RNAs by flow cytometry. Notably, this assay allowed us to identify  
400 gene expression differences within individual cells that may be lost in bulk analysis. Furthermore, the use of a  
401 branching fluorescent probe targeting the RNA of interest allows magnification of low signals without requiring  
402 replication of the gene of interest with potentially inadequate/inefficient primers. These data were consistent  
403 with our previous findings, indicating that viral infection lead to the induction of both viral (TMERs, EBERs) and  
404 host (U6 snRNA, 4.5 rRNA) pol III-derived transcripts. An alternate explanation for these findings is that cells  
405 with inherently higher pol III activity are more susceptible to viral infection, resulting in the observation of both  
406 high viral pol II gene expression (ORF18) coupled with high expression of pol III-derived ncRNAs. As this  
407 assay measures steady-state RNA levels that are influenced by RNA production and decay, changes in  
408 measured RNA levels may be influenced by factors such as transcriptional induction, RNA stability, and/or  
409 degradation.

## $\gamma$ HV68 infection activates pol III promoters

410 Previous reports show that  $\gamma$ HV infection can have diverse effects on pol III transcription, ranging from  
411 a general induction of pol III machinery (e.g. in the context of EBV and EBNA1 (32, 50)), to the selective  
412 induction of pol III-transcribed RNAs (e.g. induction of specific host vault RNAs in EBV latently infected cells  
413 (30, 31), and the host SINE RNAs in  $\gamma$ HV68-infected cells (33)). One challenge in interpreting these different  
414 findings is that these studies have been done in different states of infection (latent versus lytic), in different cell  
415 types, and in different states of cellular transformation. In many cases, the mechanistic insights gained from  
416 these studies could only be gained through the use of *in vitro* studies. In keeping with this, we anticipate that  
417 the  $\gamma$ HV68 system will afford unique insights in how the  $\gamma$ HVs regulate pol III-dependent ncRNA expression,  
418 allowing the analysis of primary infection coupled with technologies to measure promoter activity and  
419 endogenous ncRNA expression. For example, our single-cell analysis of pol III-derived transcripts – U6 snRNA  
420 and 4.5 rRNA – supported that  $\gamma$ HV68-infection not only increases pol III-dependent promoter activity (as  
421 observed in experiments with reporter constructs), but also increases the endogenous expression of these  
422 transcripts. Future strategies to improve high throughput direct comparison of promoters could include the use  
423 of reporter based constructs such as those described in this study along with other reporter-based readouts,  
424 such as recently reported fluorescent RNA aptamers that do not rely on translation (51). How host and viral  
425 ncRNAs are regulated as a function of cell type and virus stage of infection remains an important unanswered  
426 question.

427 In total, our studies revealed a  $\gamma$ HV68-dependent induction in the activity of host and viral pol III  
428 promoters. This induction was seen in the expression of a reporter gene, as well as in the endogenous  
429 expression of pol III-dependent transcripts. Though previous reports have focused on the virus-mediated  
430 upregulation of specific host ncRNAs, these experiments suggest a broader effect of lytic  $\gamma$ HV68 infection on  
431 pol III activity. This suggests that  $\gamma$ HV68 modulation of the host transcriptional landscape goes beyond mRNA  
432 regulation, and that pol III-dependent transcripts are likely to play a wider role in  $\gamma$ HV68 pathogenesis than  
433 previously appreciated.

$\gamma$ HV68 infection activates pol III promoters

## METHODS

**Viruses and tissue culture.** All viruses were derived from a BAC-derived WT  $\gamma$ HV68 (52). For some experiments, the TMER total knock-out (TMER-TKO) virus was used; this virus was generated as previously described (25). Viruses were propagated and titered as previously described (25). EBER-K1 virus contains EBERs 1 and 2 in the TMER-TKO virus backbone. Its generation and characterization are described in a manuscript in preparation.

Human endothelial kidney (HEK 293) and murine fibroblast (3T12) cells were cultured in Dulbecco's modified Eagle medium (DMEM; Life Technologies) supplemented with 5% fetal bovine serum (FBS; Atlanta Biologicals), 2 mM L-glutamine, 10 U/ml penicillin, and 10  $\mu$ g/ml streptomycin sulfate (complete DMEM). Cells were cultured at 37°C with 5% CO<sub>2</sub>.

**Mutagenesis of pNL1.1 to create the pNLP3 NanoLuc luciferase reporter.** The promoterless NanoLuc luciferase reporter vector pNL1.1[*Nluc*] was obtained from Promega, and primers were designed to introduce silent mutations to remove the pol III termination signal in the NanoLuc coding sequence; these primers are listed in Table 2. Mutagenesis PCR was performed with the following cycles: (i) 95° for 30s, (ii) 12 cycles of 95°C for 30s, 55°C for 1 min, 68°C for 3 m. The resulting DNA was digested with DpnI (New England Biolabs Inc) and transformed into XL1-Blue super-competent cells (Agilent). Bacterial colonies were sequenced to confirm the correct mutations. The resulting plasmid was named "pNLP3" to indicate that it is a NanoLuc plasmid optimized for pol III.

**Generating a pol III promoter-driven NanoLuc reporter panel.** All promoters were generated to include XhoI and HindIII overhang sequences on the 5' and 3' ends respectively. Several promoters were constructed using ligated oligonucleotides. All sequences for primers and oligonucleotides used in this work are shown in Table 2. PCR-amplified promoters and pNLP3 were digested with XhoI and HindIII, then promoters were ligated into pNLP3 using T4 DNA ligase (New England BioLabs Inc). Ligated constructs were transformed into One Shot electro- or chemically competent TOP10 *E. coli* cells (Thermo Fisher Scientific, #C404052 or #C404010), which were then plated at several dilutions on LB agar containing ampicillin.

## $\gamma$ HV68 infection activates pol III promoters

459 Resulting colonies were expanded in LB broth with ampicillin and plasmid was isolated using the QIAprep Spin  
460 Miniprep Kit (Qiagen). All constructs were confirmed by sequencing.

461 **Transfecting cells.** For transfections, HEK 293 cells were cultured in 5% FBS DMEM without penicillin  
462 or streptomycin for approximately 24 hours. Transfection solutions contained Opti-MEM (Thermo Fisher  
463 Scientific), NanoLuc plasmid (pNLP3 with inserted pol III promoters), and the Firefly control plasmid (pGL3-  
464 Control; Promega). After plasmids were added to the Opti-MEM, solutions were incubated with X-tremeGENE  
465 HP DNA Transfection Reagent (Sigma-Aldrich) for at least 15 minutes at room temperature. Transfections  
466 were performed in several plate formats, depending on the downstream use; transfection solutions were added  
467 dropwise to the appropriate wells (10  $\mu$ L of solution for 96-well plate, 100  $\mu$ L of solution in 12-well plates, 200  
468  $\mu$ L of solution in 6-well plates). For all transfections, the molar ratio of NanoLuc plasmid to Firefly plasmid was  
469 kept at 10:1; the total amount of DNA transfected per well was adjusted depending on the plate size  
470 (approximately 10 ng for 96-well, 100 ng for 12-well, and 200 ng for 6-well). Some experiments involved  
471 transfecting 2  $\mu$ g of total plasmid per well in a 6-well format. Cells were incubated with transfection solution for  
472 24 hours prior to downstream applications, unless otherwise stated.

473 To analyze how promoter activity and pol III transcription was affected by  $\gamma$ HV68 infection, transfected  
474 HEK 293 (for NanoLuc experiments) or 3T12 (for RNA flow) cells were infected with WT, TMER-TKO, or  
475 EBER-KI  $\gamma$ HV68 at a multiplicity of infection (MOI) of 1 or 5 plaque forming units per cell. Cells were cultured  
476 for approximately 24 h prior to infection. Cell counts were determined by treating with 0.05% Trypsin-EDTA  
477 (Life Tech, #25300-054) to remove and cells. These cells were mixed with Trypan Blue dye (Bio-Rad, #145-  
478 0021) to obtain a live cell count using the TC20 Automated Cell Counter (Bio-Rad). Virus stocks were mixed  
479 with 5% complete DMEM, then added to cells and incubated with virus for 1 hour. Viral inoculum was then  
480 removed and replaced with complete 5% DMEM. For samples treated with phosphonoacetic acid (PAA, 200  
481  $\mu$ g/mL, Sigma-Aldrich #284270), inoculum was removed and replaced with 5% complete DMEM containing the  
482 drug. Inhibition of RNA polymerase III was achieved by treating cells with 40  $\mu$ M of CAS 577784-91-9 (Sigma,  
483 #557404-M) immediately prior to transfection and again following viral inoculation.

## $\gamma$ HV68 infection activates pol III promoters

484 **Dual luciferase assays.** Following transfection and infection, HEK 293 cell lysates were collected for  
485 analysis of luciferase activity. All luciferase assays were performed using the Nano-Glo® Dual-Luciferase®  
486 Reporter Assay System (Promega). For experiments performed in the 12-well format, supernatant was removed  
487 and cells were scraped, collected into 1.5mL tubes, then pelleted. Cell pellets were resuspended in 250  $\mu$ L of  
488 Passive Lysis Buffer, per the manufacturer's protocol. 80  $\mu$ L of the cell suspensions were used for assays. For  
489 luciferase assays performed in the 96-well format, 80  $\mu$ L of ONE-Glo™ EX Reagent was added directly to the  
490 cells and supernatant, as recommended by the manufacturer. Samples were incubated at room temperature  
491 while on a shaker for three minutes. This solution was then transferred from a transparent 96-well culture plate  
492 to a white-wall luminescence plate prior to reading Firefly luciferase activity on the Tecan Infinite® 200 PRO  
493 plate reader. Then, 80  $\mu$ L of the NanoDLR™ Stop & Glo® Reagent was added to the solution and incubated at  
494 room temperature on a shaker for at least 10 minutes. Samples were read on the Infinite® 200 PRO again for  
495 the NanoLuc luminescence measurement.

496 **RT-PCR and RT-qPCR.** RNA was isolated from transfected HEK 293 cells with TRIzol® Reagent  
497 (Thermo Fisher Scientific, #15596026) and DNase-treated with TURBO™ DNase (Invitrogen, #AM2238)  
498 following the manufacturer's protocols. RNA amplification and removal of DNA was confirmed by RT-PCR or  
499 PCR amplification of the NanoLuc gene and a control host gene, 18S. RT-PCR was performed using the  
500 OneStep RT-PCR Kit (Qiagen, #210212), with the following conditions: (i) 50°C for 30 m, (ii) 95°C for 15 m, (iii)  
501 40 cycles of 94°C for 30 s, 52°C for 30 s, and 72°C for 30 s, (iv) 72°C for 10 m, (v) hold at 4°C. PCR was  
502 performed using Taq DNA polymerase (Qiagen, #201205) with the following conditions: (i) 95°C for 5 min, (ii) 40  
503 cycles of 94°C for 30 s, 52°C for 30 s, 72°C for 30 s, (iii) 72°C for 10 m, (iv) hold at 4°C. RNA samples that showed  
504 no product following PCR amplification were deemed DNA-free, and converted to cDNA using SuperScript III  
505 Reverse Transcriptase (Invitrogen, #18080093) following the manufacturer's protocol. 100 ng of the cDNA was  
506 then used for qPCR analysis of the NanoLuc, human pre-tRNA-Tyr-GTA-1-1,  $\gamma$ HV68 TMER1, and human 18S  
507 genes using the iQ™ SYBER® Green Supermix (Bio-Rad, #1708880) with the following conditions: i) 95°C for 3  
508 m, ii) 40 cycles of 95°C for 15 s, 60°C or 61°C for 1 m, iii) 95°C for 15 s, 60°C for 1 m, 95°C for 15 s. Amplification  
509 of NanoLuc, pre-tRNA, or TMER1 was normalized to 18S expression to calculate the relative difference of target

γHV68 infection activates pol III promoters

510 gene expression using the Pfaffl method:  $\frac{\text{NanoLuc Primer Efficiency}^{\text{Target } \Delta Ct}}{18S \text{ Primer Efficiency}^{18S \Delta Ct}}$  (53). Single product for each target

511 was confirmed by melt curves and gel electrophoresis of product following qPCR.

512 NFAT5 expression was measured using primer-probe qPCR of 100 ng cDNA with the VIC probe and  
513 Black Hole Quencher (BHQ). Conditions for the qPCR were: i) 95°C for 10 m, ii) 40 cycles of 95°C for 10 s, 60°C  
514 for 30 s, 72°C for 1 s, iii) 40°C for 30 s. Quantity of NFAT5 was determined using a plasmid-based standard  
515 curve.

516 **PrimeFlow RNA assay.** The PrimeFlow RNA assay kit (Thermo Fisher Scientific, # 88-18005-210) was  
517 used to analyze expression of non-coding RNAs in mock and γHV68-infected 3T12 cells. Cells were infected at  
518 an MOI of 1 or 5 for 16 h, then processed following the manufacturer's protocol. Probes used were: TMERs  
519 (Type 4/AF488 or Type 1/AF647), EBERs (Type 1/AF647), ORF18 (Type 4/AF488), and U6 snRNA or 4.5 rRNA  
520 (Type 6/AF750), with compatible probe labels depending on the experiment. Samples were collected on an LSR  
521 II Flow Cytometer (BD Biosciences), and included single stain and "full minus one" controls. Flow cytometry data  
522 were analyzed using FlowJo software (version 10.6.1), with compensation based on single stained beads and  
523 cells. Compensated flow cytometry data were subsequently analyzed for singlet events based on doublet  
524 discrimination as exemplified in Figure 7. Distinctions of negative and positive populations were based on control  
525 samples as shown in Figures 8 and 9.

526 **Software and statistical analysis.** Statistical analysis and graphing were done in GraphPad Prism  
527 (Version 8.0d). Statistical significance was tested by unpaired t test (comparing two conditions), one-way ANOVA  
528 (comparing three or more conditions), or two-way ANOVA (comparing grouped data) and subjected to multiple  
529 corrections tests using recommended settings in Prism. All flow cytometry data were analyzed in FlowJo (version  
530 10.6.1) with flow cytometry data shown as pseudo-color dot plots.

γHV68 infection activates pol III promoters

531 **ACKNOWLEDGEMENTS**

532 This work was supported by the NIH grants R01AI121300 to LFvD and R21 AI134084 to LFvD and ETC,  
533 T32 AI052066 to ANK and CO RNA Biosciences summer internship support to AM.

534 We thank the members of the Clambey and van Dyk lab for helpful discussions, members of the Colorado  
535 RNA Bioscience Initiative for their insights, the Colorado ClinImmune core for flow cytometry services, and the  
536 Molecular Biology Core Facility at Anschutz Medical Campus for sequencing services. We also thank the  
537 Functional Genomics Facility at University of Colorado and the lab of Dr. Joan Steitz lab for their generous gifts  
538 of the pLKO.1-puro plasmid (used to clone the U6 promoter) and the pSP73-EBER plasmid (used to clone the  
539 EBER promoters), respectively.

540



## $\gamma$ HV68 infection activates pol III promoters

### 541 REFERENCES

- 542 1. Longnecker R, Kieff E, Cohen JI. 2013. Epstein-Barr Virus, Fields Virology, 6th ed. Wolters Kluwer Health Adis (ESP).  
543 2. Ganem D. 2006. KSHV infection and the pathogenesis of Kaposi's sarcoma. *Annu Rev Pathol* 1:273-96.  
544 3. Barton E, Mandal P, Speck SH. 2011. Pathogenesis and host control of gammaherpesviruses: lessons from the  
545 mouse. *Annu Rev Immunol* 29:351-97.  
546 4. Cesarman E. 2011. Gammaherpesvirus and lymphoproliferative disorders in immunocompromised patients.  
547 *Cancer Lett* 305:163-74.  
548 5. Samols MA, Hu J, Skalsky RL, Renne R. 2005. Cloning and identification of a microRNA cluster within the latency-  
549 associated region of Kaposi's sarcoma-associated herpesvirus. *J Virol* 79:9301-5.  
550 6. Pfeffer S, Sewer A, Lagos-Quintana M, Sheridan R, Sander C, Grasser FA, van Dyk LF, Ho CK, Shuman S, Chien M,  
551 Russo JJ, Ju J, Randall G, Lindenbach BD, Rice CM, Simon V, Ho DD, Zavolan M, Tuschl T. 2005. Identification of  
552 microRNAs of the herpesvirus family. *Nat Methods* 2:269-76.  
553 7. Diebel KW, Smith AL, van Dyk LF. 2010. Mature and functional viral miRNAs transcribed from novel RNA  
554 polymerase III promoters. *RNA* 16:170-85.  
555 8. Sun R, Lin SF, Gradoville L, Miller G. 1996. Polyadenylylated nuclear RNA encoded by Kaposi sarcoma-associated  
556 herpesvirus. *Proc Natl Acad Sci U S A* 93:11883-8.  
557 9. Cai X, Lu S, Zhang Z, Gonzalez CM, Damania B, Cullen BR. 2005. Kaposi's sarcoma-associated herpesvirus expresses  
558 an array of viral microRNAs in latently infected cells. *Proc Natl Acad Sci U S A* 102:5570-5.  
559 10. Zhu JY, Strehle M, Frohn A, Kremmer E, Hofig KP, Meister G, Adler H. 2010. Identification and analysis of expression  
560 of novel microRNAs of murine gammaherpesvirus 68. *J Virol* 84:10266-75.  
561 11. Reese TA, Xia J, Johnson LS, Zhou X, Zhang W, Virgin HW. 2010. Identification of novel microRNA-like molecules  
562 generated from herpesvirus and host tRNA transcripts. *J Virol* 84:10344-53.  
563 12. Kim DN, Lee SK. 2012. Biogenesis of Epstein-Barr virus microRNAs. *Mol Cell Biochem* 365:203-10.  
564 13. Rosa MD, Gottlieb E, Lerner MR, Steitz JA. 1981. Striking similarities are exhibited by two small Epstein-Barr virus-  
565 encoded ribonucleic acids and the adenovirus-associated ribonucleic acids VAI and VAIL. *Mol Cell Biol* 1:785-96.  
566 14. Ahmed W, Philip PS, Tariq S, Khan G. 2014. Epstein-Barr virus-encoded small RNAs (EBERs) are present in fractions  
567 related to exosomes released by EBV-transformed cells. *PLoS One* 9:e99163.  
568 15. Baglio SR, van Eijndhoven MA, Koppers-Lalic D, Berenguer J, Loughheed SM, Gibbs S, Leveille N, Rinkel RN, Hopmans  
569 ES, Swaminathan S, Verkuijlen SA, Scheffer GL, van Kuppeveld FJ, de Gruijl TD, Bultink IE, Jordanova ES,  
570 Hackenberg M, Piersma SR, Knol JC, Voskuyl AE, Wurdinger T, Jimenez CR, Middeldorp JM, Pegtel DM. 2016.  
571 Sensing of latent EBV infection through exosomal transfer of 5'pppRNA. *Proc Natl Acad Sci U S A* 113:E587-96.  
572 16. Iwakiri D, Zhou L, Samanta M, Matsumoto M, Ebihara T, Seya T, Imai S, Fujieda M, Kawa K, Takada K. 2009. Epstein-  
573 Barr virus (EBV)-encoded small RNA is released from EBV-infected cells and activates signaling from Toll-like  
574 receptor 3. *J Exp Med* 206:2091-9.  
575 17. Lerner MR, Andrews NC, Miller G, Steitz JA. 1981. Two small RNAs encoded by Epstein-Barr virus and complexed  
576 with protein are precipitated by antibodies from patients with systemic lupus erythematosus. *Proc Natl Acad Sci*  
577 *U S A* 78:805-9.  
578 18. Iwakiri D. 2016. Multifunctional non-coding Epstein-Barr virus encoded RNAs (EBERs) contribute to viral  
579 pathogenesis. *Virus Res* 212:30-8.  
580 19. Li Z, Duan Y, Cheng S, Chen Y, Hu Y, Zhang L, He J, Liao Q, Yang L, Sun LQ. 2015. EBV-encoded RNA via TLR3 induces  
581 inflammation in nasopharyngeal carcinoma. *Oncotarget* 6:24291-303.  
582 20. Samanta M, Iwakiri D, Kanda T, Imaizumi T, Takada K. 2006. EB virus-encoded RNAs are recognized by RIG-I and  
583 activate signaling to induce type I IFN. *EMBO J* 25:4207-14.  
584 21. Samanta M, Iwakiri D, Takada K. 2008. Epstein-Barr virus-encoded small RNA induces IL-10 through RIG-I-mediated  
585 IRF-3 signaling. *Oncogene* 27:4150-60.  
586 22. Diebel KW, Claypool DJ, van Dyk LF. 2014. A conserved RNA polymerase III promoter required for  
587 gammaherpesvirus TMER transcription and microRNA processing. *Gene* 544:8-18.

## $\gamma$ HV68 infection activates pol III promoters

- 588 23. Bowden RJ, Simas JP, Davis AJ, Efstathiou S. 1997. Murine gammaherpesvirus 68 encodes tRNA-like sequences  
589 which are expressed during latency. *J Gen Virol* 78 ( Pt 7):1675-87.
- 590 24. Feldman ER, Kara M, Coleman CB, Grau KR, Oko LM, Krueger BJ, Renne R, van Dyk LF, Tibbetts SA. 2014. Virus-  
591 encoded microRNAs facilitate gammaherpesvirus latency and pathogenesis in vivo. *MBio* 5:e00981-14.
- 592 25. Diebel KW, Oko LM, Medina EM, Niemeyer BF, Warren CJ, Claypool DJ, Tibbetts SA, Cool CD, Clambey ET, van Dyk  
593 LF. 2015. Gammaherpesvirus small noncoding RNAs are bifunctional elements that regulate infection and  
594 contribute to virulence in vivo. *MBio* 6:e01670-14.
- 595 26. Bullard WL, Kara M, Gay LA, Sethuraman S, Wang Y, Nirmalan S, Esemeli A, Feswick A, Hoffman BA, Renne R,  
596 Tibbetts SA. 2019. Identification of murine gammaherpesvirus 68 miRNA-mRNA hybrids reveals miRNA target  
597 conservation among gammaherpesviruses including host translation and protein modification machinery. *PLoS*  
598 *Pathog* 15:e1007843.
- 599 27. Chiu YH, Macmillan JB, Chen ZJ. 2009. RNA polymerase III detects cytosolic DNA and induces type I interferons  
600 through the RIG-I pathway. *Cell* 138:576-91.
- 601 28. Yoneyama M, Fujita T. 2007. Function of RIG-I-like receptors in antiviral innate immunity. *J Biol Chem* 282:15315-  
602 8.
- 603 29. White RJ. 2005. RNA polymerases I and III, growth control and cancer. *Nat Rev Mol Cell Biol* 6:69-78.
- 604 30. Amort M, Nachbauer B, Tuzlak S, Kieser A, Schepers A, Villunger A, Polacek N. 2015. Expression of the vault RNA  
605 protects cells from undergoing apoptosis. *Nat Commun* 6:7030.
- 606 31. Nandy C, Mrazek J, Stoiber H, Grasser FA, Huttenhofer A, Polacek N. 2009. Epstein-barr virus-induced expression  
607 of a novel human vault RNA. *J Mol Biol* 388:776-84.
- 608 32. Felton-Edkins ZA, Kondrashov A, Karali D, Fairley JA, Dawson CW, Arrand JR, Young LS, White RJ. 2006. Epstein-  
609 Barr virus induces cellular transcription factors to allow active expression of EBER genes by RNA polymerase III. *J*  
610 *Biol Chem* 281:33871-80.
- 611 33. Karijolic J, Abernathy E, Glaunsinger BA. 2015. Infection-Induced Retrotransposon-Derived Noncoding RNAs  
612 Enhance Herpesviral Gene Expression via the NF-kappaB Pathway. *PLoS Pathog* 11:e1005260.
- 613 34. Karijolic J, Zhao Y, Alla R, Glaunsinger B. 2017. Genome-wide mapping of infection-induced SINE RNAs reveals a  
614 role in selective mRNA export. *Nucleic Acids Res* 45:6194-6208.
- 615 35. Schaller AM, Tucker J, Willis I, Glaunsinger BA. 2020. Conserved Herpesvirus Kinase ORF36 Activates B2  
616 Retrotransposons during Murine Gammaherpesvirus Infection. *J Virol* 94.
- 617 36. Oko LM, Kimball AK, Kaspar RE, Knox AN, Coleman CB, Rochford R, Chang T, Alderete B, van Dyk LF, Clambey ET.  
618 2019. Multidimensional analysis of Gammaherpesvirus RNA expression reveals unexpected heterogeneity of gene  
619 expression. *PLoS Pathog* 15:e1007849.
- 620 37. White RJ. 2004. RNA polymerase III transcription and cancer. *Oncogene* 23:3208-16.
- 621 38. Rollins J, Veras I, Cabarcas S, Willis I, Schramm L. 2007. Human Maf1 negatively regulates RNA polymerase III  
622 transcription via the TFIIIB family members Brf1 and Brf2. *Int J Biol Sci* 3:292-302.
- 623 39. Bianco C, Mohr I. 2019. Ribosome biogenesis restricts innate immune responses to virus infection and DNA. *Elife*  
624 8.
- 625 40. White RJ. 2011. Transcription by RNA polymerase III: more complex than we thought. *Nat Rev Genet* 12:459-63.
- 626 41. Schramm L, Pendergrast PS, Sun Y, Hernandez N. 2000. Different human TFIIIB activities direct RNA polymerase III  
627 transcription from TATA-containing and TATA-less promoters. *Genes Dev* 14:2650-63.
- 628 42. Summers WC, Klein G. 1976. Inhibition of Epstein-Barr virus DNA synthesis and late gene expression by  
629 phosphonoacetic acid. *J Virol* 18:151-5.
- 630 43. Li D, Fu W, Swaminathan S. 2018. Continuous DNA replication is required for late gene transcription and  
631 maintenance of replication compartments in gammaherpesviruses. *PLoS Pathog* 14:e1007070.
- 632 44. Gunnery S, Mathews MB. 1995. Functional mRNA can be generated by RNA polymerase III. *Mol Cell Biol* 15:3597-  
633 607.
- 634 45. Gunnery S, Maivali U, Mathews MB. 1997. Translation of an uncapped mRNA involves scanning. *J Biol Chem*  
635 272:21642-6.

## $\gamma$ HV68 infection activates pol III promoters

- 636 46. Rumi M, Ishihara S, Aziz M, Kazumori H, Ishimura N, Yuki T, Kadota C, Kadowaki Y, Kinoshita Y. 2006. RNA  
637 polymerase II mediated transcription from the polymerase III promoters in short hairpin RNA expression vector.  
638 *Biochem Biophys Res Commun* 339:540-7.
- 639 47. Orioli A, Pascali C, Quartararo J, Diebel KW, Praz V, Romascano D, Percudani R, van Dyk LF, Hernandez N,  
640 Teichmann M, Dieci G. 2011. Widespread occurrence of non-canonical transcription termination by human RNA  
641 polymerase III. *Nucleic Acids Res* 39:5499-512.
- 642 48. Muller M, Hutin S, Marigold O, Li KH, Burlingame A, Glaunsinger BA. 2015. A ribonucleoprotein complex protects  
643 the interleukin-6 mRNA from degradation by distinct herpesviral endonucleases. *PLoS Pathog* 11:e1004899.
- 644 49. Glaunsinger BA. 2015. Modulation of the Translational Landscape During Herpesvirus Infection. *Annu Rev Virol*  
645 2:311-33.
- 646 50. Owen TJ, O'Neil JD, Dawson CW, Hu C, Chen X, Yao Y, Wood VH, Mitchell LE, White RJ, Young LS, Arrand JR. 2010.  
647 Epstein-Barr virus-encoded EBNA1 enhances RNA polymerase III-dependent EBER expression through induction  
648 of EBER-associated cellular transcription factors. *Mol Cancer* 9:241.
- 649 51. Song W, Filonov GS, Kim H, Hirsch M, Li X, Moon JD, Jaffrey SR. 2017. Imaging RNA polymerase III transcription  
650 using a photostable RNA-fluorophore complex. *Nat Chem Biol* 13:1187-1194.
- 651 52. Adler H, Messerle M, Wagner M, Koszinowski UH. 2000. Cloning and mutagenesis of the murine  
652 gammaherpesvirus 68 genome as an infectious bacterial artificial chromosome. *J Virol* 74:6964-74.
- 653 53. Pfaffl MW. 2001. A new mathematical model for relative quantification in real-time RT-PCR. *Nucleic Acids Res*  
654 29:e45.
- 655 54. Dumay-Odelot H, Durrieu-Gaillard S, El Ayoubi L, Parrot C, Teichmann M. 2014. Contributions of in vitro  
656 transcription to the understanding of human RNA polymerase III transcription. *Transcription* 5:e27526.
- 657 55. van Zon A, Mossink MH, Schoester M, Scheffer GL, Scheper RJ, Sonneveld P, Wiemer EA. 2001. Multiple human  
658 vault RNAs. Expression and association with the vault complex. *J Biol Chem* 276:37715-21.
- 659 56. Vachon VK, Conn GL. 2016. Adenovirus VA RNA: An essential pro-viral non-coding RNA. *Virus Res* 212:39-52.
- 660 57. Howe JG, Shu MD. 1989. Epstein-Barr virus small RNA (EBER) genes: unique transcription units that combine RNA  
661 polymerase II and III promoter elements. *Cell* 57:825-34.
- 662 58. Howe JG, Shu MD. 1993. Upstream basal promoter element important for exclusive RNA polymerase III  
663 transcription of the EBER 2 gene. *Mol Cell Biol* 13:2655-65.
- 664 59. Niller HH, Salamon D, Ilg K, Koroknai A, Banati F, Bauml G, Rucker O, Schwarzmann F, Wolf H, Minarovits J. 2003.  
665 The in vivo binding site for oncoprotein c-Myc in the promoter for Epstein-Barr virus (EBV) encoding RNA (EBER)  
666 1 suggests a specific role for EBV in lymphomagenesis. *Med Sci Monit* 9:HY1-9.

667

$\gamma$ HV68 infection activates pol III promoters

## FIGURE LEGENDS

**Figure 1. RNA Polymerase III promoters contain distinct motifs and respond to viral infection. (A)** Pol III transcribes RNA from gene-internal (type 1 and type 2) or gene-external (type 3) promoters. Each promoter type contains distinct motifs, which are in turn bound by specific transcription factors (TF) that recruit pol III to the promoter. Viral promoters can have canonical type 2 promoters, such as adenovirus; however, the  $\gamma$ HV68 TMERs contain a triplicated, overlapping A box motif, and the EBV EBER promoters include upstream elements. Gray boxes indicate the gene, while the “TTTT” marks the end of the gene where pol III transcription is terminated. Diagrams are not to scale. A = A box, B = B box, C = C box, IE = intermediate element, “TTTT” = pol III termination signal, TF = transcription factor, TATA = TATA box, PSE = proximal sequence element, DSE = distal sequence elements, ETAB = EBER TATA-like box, ATF = activating transcription factor binding sequence, Sp1 = Sp1-like binding sequence. **(B)** Optimization of the NanoLuc reporter vector. Mutations were introduced into the pNL1.1 vector to remove the pol III termination signal (TTTT) from the NanoLuc coding region, resulting in the pNLP3 vector. The human U6 promoter was cloned into each of these reporters, and dual luciferase assays were performed to compare luciferase output (left panel). Data shown is representative of two independent experiments with biological triplicates. Additionally, RNA was isolated from cells transfected with these two constructs. Cells were mock or WT  $\gamma$ HV68-infected for 16 h, then cellular RNA was used as a template for primers targeting the entire NanoLuc gene (top gel, 534 nt), or targeting just the NanoLuc sequence upstream of the termination sequence (bottom gel, 234 nt) (right panel, with primers as indicated). Data shown is from one experiment with biological triplicates. NTC = Non-template control, black triangles = primers, \* = location of termination sequence in pNL1.1. **(C)** Experimental design. HEK 293 cells are transfected with a control Firefly reporter (pGL3) and a pNLP3 reporter expressed from a pol III promoter of interest. 24 h post-transfection, cells are infected with wild-type (WT)  $\gamma$ HV68 at an MOI of 1, or mock treated. Cell lysates are collected 24 h post-transfection for the dual luciferase assay. Promoter activity was measured for the **(D)** U6 and **(E)** TMER1 promoters using a dual luciferase assay. Cells were harvested every 4 hours post-infection up to 24 h. Each time-point was repeated for biological triplicates. Raw values for the Firefly and NanoLuc activity for each promoter are shown as luminescence units (LUs). Promoter activity was analyzed as average relative

## $\gamma$ HV68 infection activates pol III promoters

luminescence units (RLUs = NanoLuc LUs / Firefly LUs), and as the fold change in NanoLuc luminescence units compared to the 4 h uninfected samples (NanoLuc fold change = Infected Sample NanoLuc LU / Mock Sample NanoLuc LU). Error bars = SEM.

**Figure 2.  $\gamma$ HV68 infection induces activity of multiple pol III promoter types.** Promoter activity was measured for the U6 (n = 8), tRNA (n = 3), EBER1 (n = 3), EBER2 (n = 4), TMER1 (n = 18), TMER4 (n = 4), and TMER5 (n = 6) promoters during infection. Luciferase assays were performed as previously described, with cell lysates collected 24 h post-infection. Each independent experiment (n) contained biological triplicates or duplicates. All promoter activity changes are analyzed as the fold change in NanoLuc activity normalized to uninfected samples (Infected NanoLuc LU / Mock NanoLuc LU). Error bars = SEM. Significant differences analyzed by t-test and indicated as asterisks. P-values are indicated as follows: \* =  $P \leq 0.05$ , \*\*\*\* =  $P \leq 0.0001$ .

**Figure 3. Inhibition of RNA polymerase III decreases luciferase activity and RNA levels from pol III promoter during  $\gamma$ HV68 infection.** Expression of endogenous control genes and reporter constructs were measured during treatment with a pol III inhibitor. Prior to transfection, samples were treated with an RNA polymerase III inhibitor (CAS 577784-91-9), marked as P3I, or left untreated. Cells were co-transfected with the SV40 promoter driven Firefly luciferase control and NanoLuc reporter constructs with the indicated promoters. Inhibited cells were treated again immediately following infection. Luciferase activity is shown in orange for pol II promoters and red for pol III promoters. RNA expression is shown in light blue for pol II promoters and dark blue for pol III promoters. **A)** Efficacy of pol III inhibition was shown by TaqMan RT-qPCR of a pol II-transcribed gene (NFAT5) and SYBER Green qPCR of pol III-transcribed genes (Human pre-tRNA-Tyr-GTA-1-1 and  $\gamma$ HV68 TMER1). Data is from 3 independent experiments with biological duplicates or triplicates per experiment.

Luciferase assays were performed as previously described, with cell lysates collected 24 h post-infection. Luciferase activities of the **B)** pol II promoters (orange, SV40-Firefly and TK- NanoLuc) and **C)** pol III promoter-NanoLuc (red) are shown. All luciferase activity changes are analyzed as the fold change in NanoLuc activity normalized to uninfected samples (Infected NanoLuc LU / Mock NanoLuc LU). NanoLuc RNA was also

## $\gamma$ HV68 infection activates pol III promoters

720 measured from **B**) a pol II promoter (light blue, TK) and **C**) a pol III promoter (dark blue, TMER1). RT-qPCR was  
721 performed for NanoLuc RNA as previously described. Cells were treated as described, and transfected with 200  
722 ng or 2  $\mu$ g of DNA. RNA was collected 24 hpi and analyzed for expression of NanoLuc RNA. Firefly activity from  
723 SV40 was measured from two independent experiments with eight samples per experiment. RT-qPCR data for  
724 200 ng are from two independent experiments with biological triplicates, and data for 2  $\mu$ g are from three  
725 independent experiments with biological triplicates or duplicates. Error bars = SEM. Significant differences  
726 analyzed by t-test and indicated as asterisks. P-values are indicated as follows: \* =  $P \leq 0.05$ , \*\* =  $P \leq 0.01$ , \*\*\* =  
727  $P \leq 0.001$ , \*\*\*\* =  $P \leq 0.0001$ .

728  
729 **Figure 4. Sequence external to the minimal promoter elements alters promoter activity. (A)** Several pol III  
730 promoters were cloned into the pNLP3 NanoLuc-expressing vector. Promoter schematics are not to scale. The  
731 canonical minimal promoter elements for each promoter are shown in blue and notated with a blue line labeled  
732 “min”, with the intermediate sequence in light grey. Upstream elements are green, and external/extended  
733 sequence is shown in dark grey. Nucleotide positions are shown above each schematic in relation to position  
734 “0”, which indicates the start of the minimal promoter sequence. Genomic coordinates are shown below each  
735 schematic in red, and refer to the following reference sequences; Human U6 (RNU6-1) = NC\_000015.10, Human  
736 tRNA-Tyr (TRY-GTA11-1) = NC\_000007.14, EBERs in Human Herpesvirus 4/EBV Whole Genome =  
737 NC\_007605.1, TMERs in MHV68 Whole Genome = NC\_001826.2. The coordinates for human U6 snRNA and  
738 tRNA are reversed to reflect their orientation as coded on the complement strand. The predicted structure for  
739 the minimal and full TMER1 promoter using the RNAfold Webserver are shown. **(B)** Cloned reporter constructs  
740 were transfected into HEK293 cells at a 10:1 molar ratio with a Firefly luciferase control expressed by the SV40  
741 promoter. TK-expressed NanoLuc was used as a positive control. Cells were not infected. Following 48 hours of  
742 transfection, dual luciferase assays were performed as previously described. Luciferase activity is expressed as  
743 the ratio of NanoLuc activity to control Firefly activity (relative luminescence units, RLUs). **(C)** Luciferase assays  
744 were performed as previously described, with cell lysates collected 24 h post-infection. All promoter activity  
745 changes are analyzed as the fold change in NanoLuc activity normalized to uninfected samples. Each

## $\gamma$ HV68 infection activates pol III promoters

746 experiment (n) included biological triplicates. Error bars = SEM. Significant differences analyzed by t-test and  
747 indicated as asterisks. P-values are indicated as follows: \* =  $P \leq 0.05$ , \*\* =  $P \leq 0.01$ , \*\*\* =  $P \leq 0.001$ , \*\*\*\* =  $P \leq$   
748 0.0001.

749  
750 **Figure 5. Effect of  $\gamma$ HV68 infection on NanoLuc transcript levels.** Promoter activity was measured for **(A)**  
751 the U6, TMER1, and EBER full promoters, or **(B)** the TMER1, TMER4, and TMER5 minimal vs. full promoters.  
752 Cells were treated as previously described and RNA was purified from cells at 16 h post-infection (U6 n = 2,  
753 TMER1, n = 5) or 24hpi (EBER1 n = 2, EBER2 n = 2, TMER4 n = 2, and TMER5, n = 2). RNA was converted to  
754 cDNA, then LightCycler real-time PCR using Syber Green was performed with primers targeting the NanoLuc  
755 gene and a host control gene (18S). The relative difference of NanoLuc was calculated using the Pfaffl method  
756 (2001, *Nucleic Acids Research*), where the ratio =  $(E_{\text{target}})^{\Delta\text{CP target (control-sample)}} / (E_{\text{ref}})^{\Delta\text{CP ref (control-sample)}}$ . Each  
757 experiment (n) included biological triplicates or duplicates. Error bars = SEM. Significant differences analyzed  
758 by t-test and indicated as asterisks. P-values are indicated as follows: \* =  $P \leq 0.05$ , \*\* =  $P \leq 0.01$ , \*\*\* =  $P \leq 0.001$ ,  
759 \*\*\*\* =  $P \leq 0.0001$ .

760  
761 **Figure 6. Effect of viral and NF- $\kappa$ B inhibitors and an NF- $\kappa$ B activator on luciferase activity during  $\gamma$ HV68**  
762 **infection. A)** Promoter activity was measured via luciferase activity for the following promoters during infection,  
763 including with concurrent PAA treatment: TMER1 (n = 5), TMER4 (n = 2), TMER5 (n = 2), EBER1 (n = 2), EBER2  
764 (n = 3), U6 (n = 2), and tRNA (n = 1). Each experiment contained biological duplicates or triplicates. Luciferase  
765 assays were performed as previously described, with cell lysates collected 24 h post-infection. NanoLuc fold  
766 change for infected samples is from previous figures for comparison to PAA-treated samples. All promoter activity  
767 changes are analyzed as the fold change in NanoLuc activity normalized to uninfected samples. **B)** Promoter  
768 activity was measured via RT-qPCR of the NanoLuc transcript expressed from the TMER1 promoter during  
769 infection and concurrent phosphonoacetic acid (PAA) treatment. RT-qPCR was performed as previously  
770 described. Data is shown as NanoLuc relative difference to a host gene (18S). N = 2 with biological triplicates.  
771 **C)** Using the same RNA from experiments shown in panel B, RT-qPCR was performed for a viral late gene (gB)

## $\gamma$ HV68 infection activates pol III promoters

772 to confirm the efficacy of PAA treatment, which resulted in an approximately 32-fold decrease in gB compared  
773 to WT infected samples. gB was not detected (N.D.) in mock samples. **D)** NF- $\kappa$ B activation with 50 ng/ $\mu$ L TNF $\alpha$   
774 (NF- $\kappa$ B reporter n = 1 for each time point, U6 n = 2, TMER1 n = 3) or **E)** NF- $\kappa$ B inhibition by 10  $\mu$ M BAY 11-7082  
775 (U6 n = 3, TMER1 n = 4). NF- $\kappa$ B activation is shown in Firefly luminescence units, while NanoLuc activity from  
776 the U6 or TMER1 promoters is expressed as fold change over mock. Cells included in the TNF $\alpha$  experiments  
777 were transfected for 12 h, while all others were transfected for 24 h as previously described. Each experiment  
778 (n) contains biological triplicates. Error bars = SEM. Significant differences analyzed by t-test (two conditions) or  
779 one-way ANOVA (three conditions) and indicated as asterisks. P-values are indicated as follows: \* = P  $\leq$  0.05,  
780 \*\* = P  $\leq$  0.01, \*\*\* = P  $\leq$  0.001, \*\*\*\* = P  $\leq$  0.0001.

781  
782 **Figure 7. Viral ncRNA expression serves as an indicator of virus infection.** Murine 3T12 fibroblasts were  
783 infected with mock, WT  $\gamma$ HV68, or an EBER knock-in (EBER-KI)  $\gamma$ HV68 at an MOI=1, harvested at 16 hpi, and  
784 subjected to the PrimeFlow RNA Assay and flow cytometric analysis. Singlets were identified using a sequential  
785 gating strategy as shown, with representative examples from mock (top), WT  $\gamma$ HV68 (middle) or EBER-KI. $\gamma$ HV68  
786 infected samples. Singlet populations were then analyzed for TMERs (Type 4/AF488), EBERs (Type1/AF647),  
787 and U6 snRNA or 4.5S RNA (Type 6/AF750 for both, each in different probe mixes).

788  
789 **Figure 8. Endogenous expression of murine U6 snRNA and 4.5S rRNA during  $\gamma$ HV68 infection.** Murine  
790 fibroblast cells (3T12) were infected with mock, WT  $\gamma$ HV68, or an EBER knock-in (EBER-KI)  $\gamma$ HV68 at an MOI=1,  
791 harvested at 16 hpi and subjected to the PrimeFlow RNA Assay and flow cytometric analysis. **(A,B)** Analysis of  
792 U6 snRNA expression comparing background fluorescence ("No probe", left) versus U6 probe hybridization in  
793 Mock (middle), or WT  $\gamma$ HV68 or EBER-KI. $\gamma$ HV68 infected cells (right). **(C,D)** Analysis of 4.5S rRNA expression  
794 comparing background fluorescence ("No probe", left) versus 4.5S rRNA probe hybridization in Mock (middle),  
795 or WT  $\gamma$ HV68 or EBER-KI. $\gamma$ HV68 infected cells (right). **(E)** Identification of virally-infected cells that express either  
796 the TMERs or the EBERs, following infection with mock, WT  $\gamma$ HV68 or EBER-KI. $\gamma$ HV68. Gates define cells based  
797 on positive or negative expression as indicated, with these populations used for subsequent quantitation in



## $\gamma$ HV68 infection activates pol III promoters

panels F and G (**F,G**) The geometric mean fluorescence intensity (gMFI) was calculated for (**F**) U6 snRNA or (**G**) 4.5S rRNA in mock infected, or virus infected samples, comparing cells that differed in expression of either the TMERs or the EBERs in WT or EBER-KI infections respectively. Data depict flow cytometric analysis of singlets, defined by sequential discrimination using SSC and FSC parameters as shown in Figure 7. Data are from 3 biological replicates, with statistical significance assessed using an unpaired t-test. Statistical significance as follows: \*\*,  $p < 0.01$  and \*\*\*,  $p < 0.001$ .

**Figure 9. Endogenous expression of murine U6 snRNA during  $\gamma$ HV68 infection.** Murine fibroblast cells (3T12) were infected with mock, WT  $\gamma$ HV68, or an EBER knock-in (EBER-KI)  $\gamma$ HV68 at an MOI=5, harvested at 16 hpi and subjected to the PrimeFlow RNA Assay and flow cytometric analysis. (**A,B**) Analysis of viral gene expression indicating viral ncRNA (TMER or EBER) expression and/or ORF18 expression comparing background fluorescence ("No probe", left) versus TMER or EBER hybridization in Mock (middle), or WT  $\gamma$ HV68 or EBER-KI. $\gamma$ HV68 infected cells (right). (**C,D**) Analysis of viral gene expression indicating ORF18 expression (top) or viral ncRNA (TMER or EBER, bottom) expression comparing background fluorescence ("No probe", left) versus probe hybridization in Mock (middle), or C) WT  $\gamma$ HV68 or D) EBER-KI. $\gamma$ HV68 infected cells (right). These plots indicate the gating used for further analysis in E-F, and gating is duplicating from Figure 9. (**E**) The geometric mean fluorescence intensity (gMFI) was calculated for viral ncRNA (TMERs or EBERs) in mock infected or virus infected samples, comparing cells that differed in expression of ORF18. (**F,G**) The gMFI was calculated for U6 snRNA in mock or virus infected samples, comparing cells that differed in expression of either (**F**) ORF18 or (**G**) TMERs or EBERs in WT or EBER-KI infections. Data depict flow cytometric analysis of singlets, defined by sequential discrimination using SSC and FSC parameters as exemplified in Figure 7. Data are representative of two experiments, with 3 biological replicates in each. Statistical significance assessed using a one-way ANOVA with multiple comparisons. Statistical significance as follows: \* =  $P \leq 0.05$ , \*\* =  $P \leq 0.01$ , \*\*\* =  $P \leq 0.001$ , \*\*\*\* =  $P \leq 0.0001$ .

$\gamma$ HV68 infection activates pol III promoters

823 **Table 1. Promoters analyzed in this study.** Pol III promoters were selected from several organisms and cloned  
 824 into a luciferase reporter to analyze promoter activity during infection. Parenthetical additions specify promoter  
 825 features (“3A” = triplicated A box; for EBERs, “+ upstream” = includes upstream elements, “no upstream” =  
 826 excludes upstream elements).

| Origin        | Promoter      | Promoter Type        | Promoter Insert Length | Reference                     |
|---------------|---------------|----------------------|------------------------|-------------------------------|
| Human         | 5S rRNA       | Type 1               | 42                     | (54)                          |
| Human         | tRNA-Tyr      | Type 2               | 53                     | Gene ID: 100189507            |
| Human         | Vault RNA1-1  | Type 2               | 65                     | (31, 55); GenBank: AF045143.1 |
| Human         | U6 snRNA      | Type 3               | 227                    | GenBank: M14486.1             |
| Adenovirus    | VA1           | Type 2               | 58                     | (56)                          |
| $\gamma$ HV68 | TMER1 full    | Type 2 (3A)          | 91                     | (22)                          |
| $\gamma$ HV68 | TMER1 minimal | Type 2 (3A)          | 55                     | (22)                          |
| $\gamma$ HV68 | TMER4 full    | Type 2 (3A)          | 93                     | (22)                          |
| $\gamma$ HV68 | TMER4 minimal | Type 2 (3A)          | 55                     | (22)                          |
| $\gamma$ HV68 | TMER5 full    | Type 2 (3A)          | 94                     | (22)                          |
| $\gamma$ HV68 | TMER5 minimal | Type 2 (3A)          | 53                     | (22)                          |
| EBV           | EBER1         | Type 2 (+ upstream)  | 157                    | (57-59)                       |
| EBV           | EBER1 minimal | Type 2 (no upstream) | 70                     | (57-59)                       |
| EBV           | EBER2         | Type 2 (+ upstream)  | 156                    | (57-59)                       |
| EBV           | EBER2 minimal | Type 2 (no upstream) | 68                     | (57-59)                       |

827

828 **Table 2. Sequences of primers and oligonucleotides used in this study.** Includes sequences for primers,  
 829 oligonucleotides, and probes used for cloning reporter constructs, sequencing, RT-PCR, and qPCR.

| Name             | Sequence                                                              | Cloning Template                      | Purpose                                                     |
|------------------|-----------------------------------------------------------------------|---------------------------------------|-------------------------------------------------------------|
| NanoLuc Mut For. | 5' – C CAA ATG GGC CAG ATC GAA AAA ATC TTC AAG GTG GTG TAC<br>CC –3'  | pNL1.1 (Promega)                      | Remove termination signal (TTTT) from pNL1.1 to make pNLP3  |
| NanoLuc Mut Rev. | 5' – GG GTC CAC CAC CTT GAA GAT TTT TTC GAT CTG GCC CAT<br>TTG G – 3' | pNL1.1 (Promega)                      |                                                             |
| U6-F-XhoI        | 5' – GTTATTCTCGAGGAGGGCCTATTTCCCATG – 3'                              | SHC001 (Functional Genomics Facility) | Clone full U6 promoter into pNLP3 (product length = 227 bp) |
| U6-R-HindIII     | 5' – GCCGCCGAAGCTTATATATAAAGCCAAGAAATC – 3'                           | SHC001 (Functional Genomics Facility) |                                                             |
| TMER-1-F-XhoI    | 5' – GTTGTCTCTCGAGGCCAGAGTAGCTCAATTC – 3'                             | $\gamma$ HV68 Left-End Plasmid        | Clone TMER1 promoter into pNLP3 (product = 91 bp)           |
| TMER-1-R-HindIII | 5' – GTCGTTAAGCTTAGTTGGACCCACTTCCTC – 3'                              | $\gamma$ HV68 Left-End Plasmid        |                                                             |

## γHV68 infection activates pol III promoters

|                     |                                                                                                                               |                        |                                                                                                               |
|---------------------|-------------------------------------------------------------------------------------------------------------------------------|------------------------|---------------------------------------------------------------------------------------------------------------|
| TMER4full_F_XhoI    | 5' - GTTATTCTCGAGGTCGGGGTAGCTCAATTG - 3'                                                                                      | γHV68 Left-End Plasmid | Clone TMER4 promoter into pNLP3 (product = 93 bp)                                                             |
| TMER4full_R_HindIII | 5' - GTTGTGAAGCTTGACGACCCGATCTCAAC - 3'                                                                                       | γHV68 Left-End Plasmid |                                                                                                               |
| TMER5full_F_XhoI    | 5' - GTACTACTCGAGGCCAGGGTAGCTCAATTG - 3'                                                                                      | γHV68 Left-End Plasmid | Clone TMER5 promoter into pNLP3 (product = 94 bp)                                                             |
| TMER5full_R_HindIII | 5' - GTTGTGAAGCTTACCACCTCCAC - 3'                                                                                             | γHV68 Left-End Plasmid |                                                                                                               |
| EBER1-XhoI-F        | 5' - GTTGTCTCGAGCAACTATAGCAAACCCCG - 3'                                                                                       | pSP73-EBER plasmid     | Clone full EBER1 promoter, including upstream elements, into pNLP3 (product length = 157 bp)                  |
| EBER1-HindIII-R     | 5' - GTTGTTAAGCTTGGGACTTGTACCCGGG - 3'                                                                                        | pSP73-EBER plasmid     |                                                                                                               |
| EBER2-XhoI-F        | 5' - GTCGTTCTCGAGAGATGCACGCTTAACC - 3'                                                                                        | pSP73-EBER plasmid     | Clone full EBER2 promoter, including upstream elements, into pNLP3 (product length = 156 bp)                  |
| EBER2-HindIII-R     | 5' - GGTGTTAAGCTTGGGACTTGCCTCGG - 3'                                                                                          | pSP73-EBER plasmid     |                                                                                                               |
| EBER1-GI-XhoI-F     | 5' - GTTCTTCTCGAGCGCTGCCCTAGAG - 3'                                                                                           | pSP73-EBER plasmid     | Clone EBER1-minimal promoter into pNLP3. Used with EBER1-HindIII-R, product = 70 bp                           |
| EBER2-GI-XhoI-F     | 5' - GTTGTCTCGAGCGTTGCCCTAGTGGTTTC - 3'                                                                                       | pSP73-EBER plasmid     |                                                                                                               |
| NanoLuc_Forward     | 5' - CAC CAT GGT CTT CAC ACT CG - 3'                                                                                          |                        | RT-PCR on pNL1.1 and pNLP3 for the NanoLuc gene                                                               |
| NanoLuc-full_Rev    | 5' - CTA GAG TCG CGG CCT TAC G - 3'                                                                                           |                        |                                                                                                               |
| NanoLuc-prestop_Rev | 5' - CGA TCT GGC CCA TTT GGT C - 3'                                                                                           |                        |                                                                                                               |
| Syber-NanoLuc-F     | 5' - CACTGGTAATCGACGGGGTT - 3'                                                                                                |                        | qPCR for the NanoLuc gene                                                                                     |
| Syber-NanoLuc-R     | 5' - TTTTGTGCGCTTCCACAGG - 3'                                                                                                 |                        |                                                                                                               |
| pNL1.1_MCR_seq      | 5' - GTG TGA ATC GAT AGT ACT AAC ATA CGC - 3'                                                                                 |                        | Ideal sequencing of any insert in the MCR of pNL1.1 or pNLP3                                                  |
| 5SrRNA-XhoI-F       | 5' - TCGAGAGCTAAGCAGGGTCGGGCCTGGTTAGTACTTGGATGGGAGAC - 3'                                                                     |                        | Oligonucleotides annealed then enzyme-treated to create the 5S rRNA promoter, then inserted into pNLP3        |
| 5SrRNA-HindIII-R    | 5' - AGCTTGTCTCCCATCCAAGTACTAACCAGGCCCGACCCTGCTTAGCT - 3'                                                                     |                        |                                                                                                               |
| Ad2-VAI_Fwd         | 5' - GTT GTT CTC GAG GTG GTC TGG UGG ATA AAT TCG CAA GGG TAT CAT GGC GGA CGC CCG GGG TTC GAA CCC CAA GCT TGT CGT C - 3'       |                        | Oligonucleotides annealed then enzyme-treated to create the adenovirus VA1 promoter, then inserted into pNLP3 |
| Ad2-VAI_Rev         | 5' - GAC GAC AAG CTT GGG GTT CGA ACC CCG GGC GTC CGC CAT GAT ACC CTT GCG AAT TTA TCC ACC AGA CCA CCT CGA GAA CAA C - 3'       |                        |                                                                                                               |
| vaultRNA1-1_Fwd     | 5' - GTT GTT CTC GAG AGC TCA GCG GTT ACT TCG ACA GTT CTT TAA TTG AAA CAA GCA ACC TGT CTG GGT TGT TCG AGA AAG CTT GTC GTC - 3' |                        | Oligonucleotides annealed then enzyme-treated to create the adenovirus vaultRNA1-1                            |

γHV68 infection activates pol III promoters

|                              |                                                                                                                                     |                                                                                          |
|------------------------------|-------------------------------------------------------------------------------------------------------------------------------------|------------------------------------------------------------------------------------------|
| vaultRNA1-1_Rev              | 5' - GAG GAC AAG CTT TCT CGA ACA ACC CAG ACA GGT TGC TTG<br>TTT CAA TTA AAG AAC TGT CGA AGT AAC CGC TGA GCT CTC GAG<br>AAC AAC - 3' | promoter, then inserted into pNLP3                                                       |
| tRNA-Tyr_Fwd                 | 5' - GTT GTT CTC GAG TAG CTC AGT GGT AGA GCA TTT AAC TGT<br>AGA TCA AGA GGT CCC TGG ATC AAC TCA AGC TTG TCG TC - 3'                 | Oligonucleotides annealed then enzyme-treated to create the human tRNA-                  |
| tRNA-Tyr_Rev                 | 5' - GAC GAC AAG CTT GAG TTG ATC CAG GGA CCT CTT GAT CTA<br>CAG TTA AAT GCT CTA CCA CTG AGC TAC TCG AGA ACA AC - 3'                 | Tyrosine(Tyr) promoter, then inserted into pNLP3                                         |
| TMER1-min-XhoI-F             | 5' - TCG AGT AGC TCA ATT GGT AGA GCA ACA GGT CAC CGA TCC<br>TGG TGG TTC TCG GTT CAA GTC C - 3'                                      | Oligonucleotides annealed to create the TMER1-minimal promoter, then inserted into pNLP3 |
| TMER1-min-HindIII-R          | 5' - AGC TTG GAC TTG AAC CGA GAA CCA CCA GGA TCG GTG ACC<br>TGT TGC TCT ACC AAT TGA GCT A - 3'                                      |                                                                                          |
| TMER4-min-XhoI-F             | 5' - TCG AGT AGC TCA ATT GGT AGA GCG GCA GGC TCA TCC CCT<br>GCA GGT TCT CGG TTC AAT CCC - 3'                                        | Oligonucleotides annealed to create the TMER4-minimal promoter, then inserted into pNLP3 |
| TMER4-min-HindIII-R          | 5' - AGCTTG GGA TTG AAC CGA GAA CCT GCA GGG GAT GAG CCT<br>GCC GCT CTA CCA ATT GAG CTA - 3'                                         |                                                                                          |
| TMER5-min-XhoI-F             | 5' - TCG AGT AGC TCA ATT GGT AGA GCA TCA GGC TAG TAT CCT<br>GTC GGT TCC GGT TCA AGT CC - 3'                                         | Oligonucleotides annealed to create the TMER5-minimal promoter, then inserted into pNLP3 |
| TMER5-min-HindIII-R          | 5' - AGC TTG GAC TTG AAC CGG AAC CGA CAG GAT ACT AGC CTG<br>ATG CTC TAC CAA TTG AGC TA - 3'                                         |                                                                                          |
| Human pre-tRNA-Tyr-GTA-1-1_F | 5' - GCCTTCGATAGCTCAGTTGGTAG - 3'                                                                                                   | To perform SYBER qPCR for the pre-tRNA-Try-GTA-1-1 gene                                  |
| Human pre-tRNA-Tyr-GTA-1-1_R | 5' - GGATTCGAACCAGCGACCT - 3'                                                                                                       |                                                                                          |
| γHV68-TMER1-iQ_F             | 5' - GAGCAACAGGTCACCGATCC - 3'                                                                                                      | To perform SYBER qPCR for TMER1 gene                                                     |
| γHV68-TMER1-iQ_R             | 5' - TGCAGACAAGTGATTGCACTG - 3'                                                                                                     |                                                                                          |
| NFAT5 Forward Primer         | 5' - CATGAGCACCAGTTCCTACAATGAT - 3'                                                                                                 |                                                                                          |
| NFAT5 Reverse Primer         | 5' - TGCTTTGGATTTTCGTTTTTCGTGATT - 3'                                                                                               | TaqMan qPCR for NFAT5 gene                                                               |
| NFAT5 Probe                  | 5' - ACGAGGTACCTCAGTGTT - 3'                                                                                                        |                                                                                          |

830

**A) Canonical Pol III Promoters:**

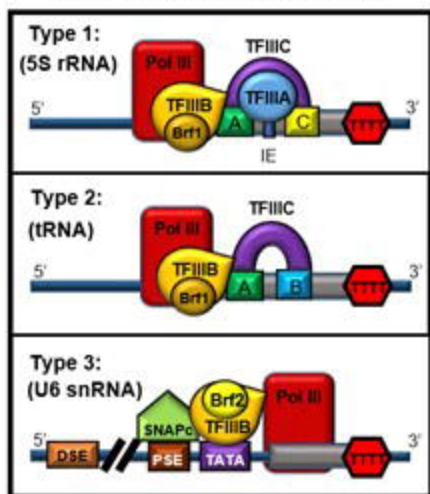

**Viral Type 2 Promoters:**

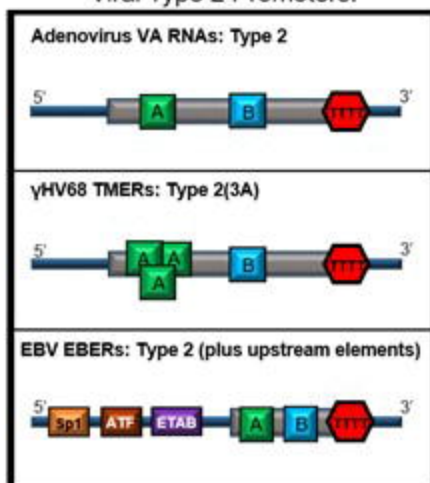

**B)**

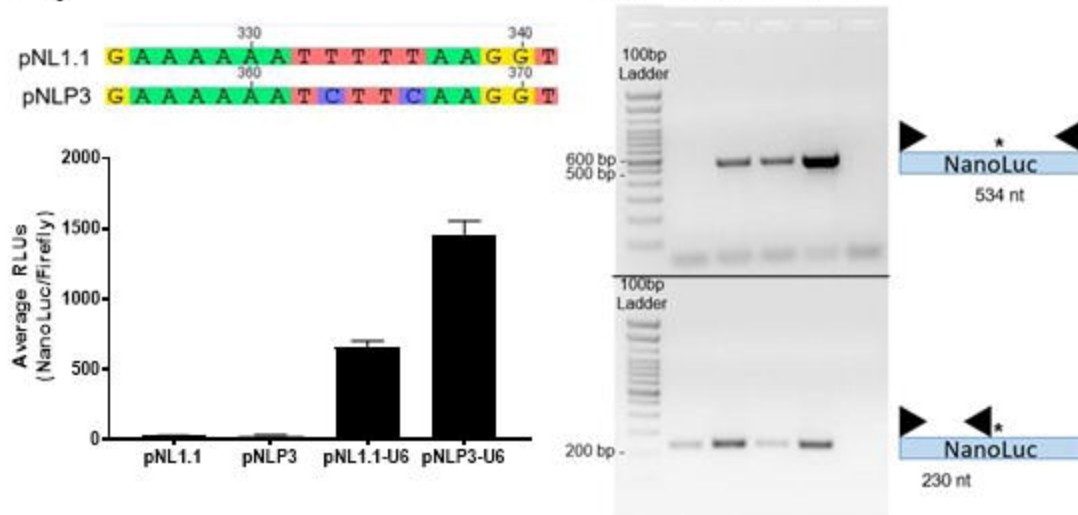

**C)**

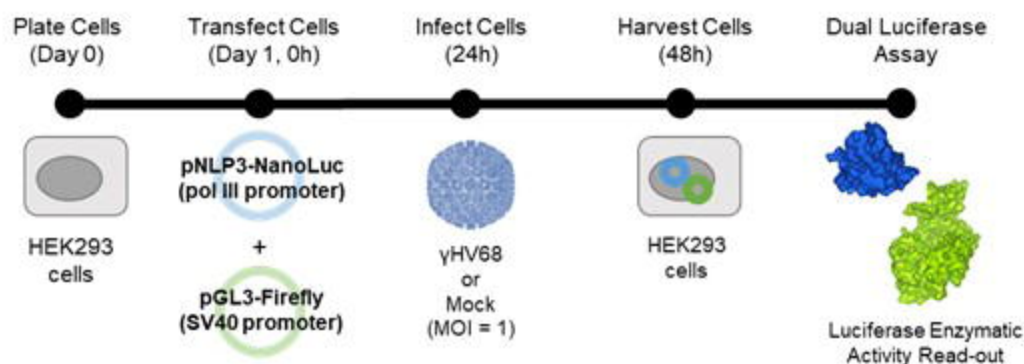

**D)**

**U6 Promoter-Driven Luciferase Activity**

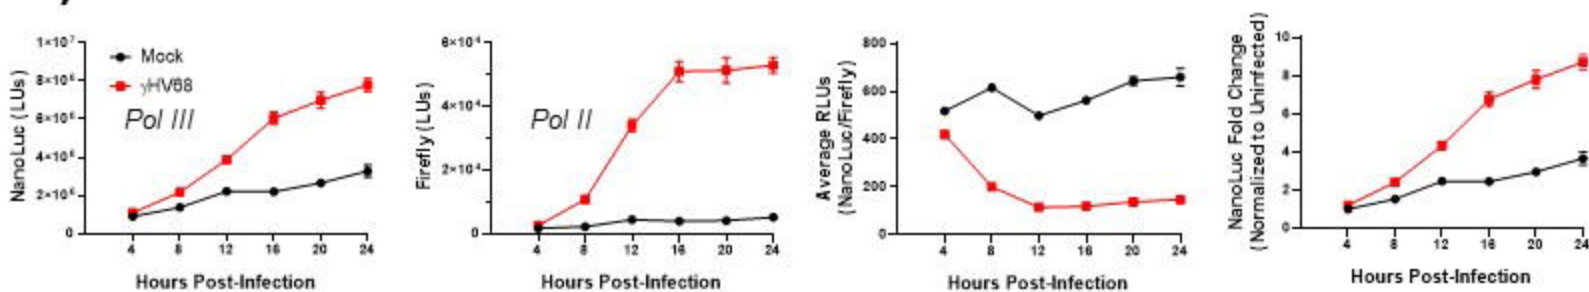

**E)**

**TMER1 Promoter-Driven Luciferase Activity**

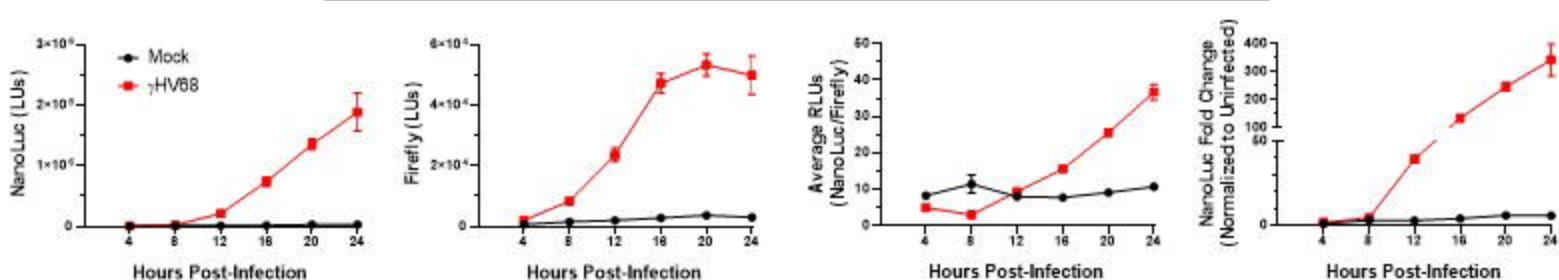

**Fig 1**  
**Knox et al**

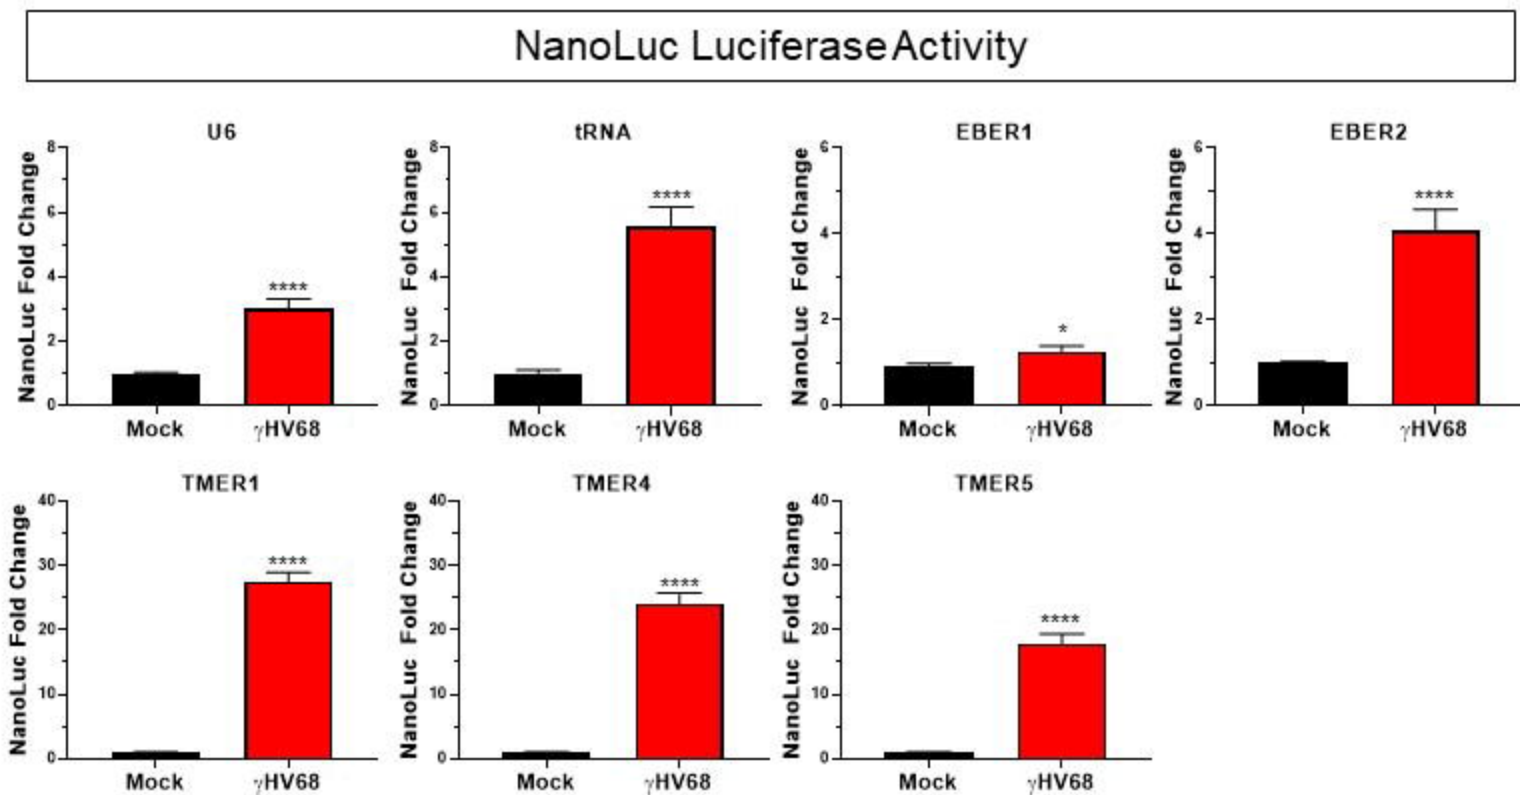

**Fig 2**  
**Knox et al**

## Pol III Inhibition – Endogenous genes

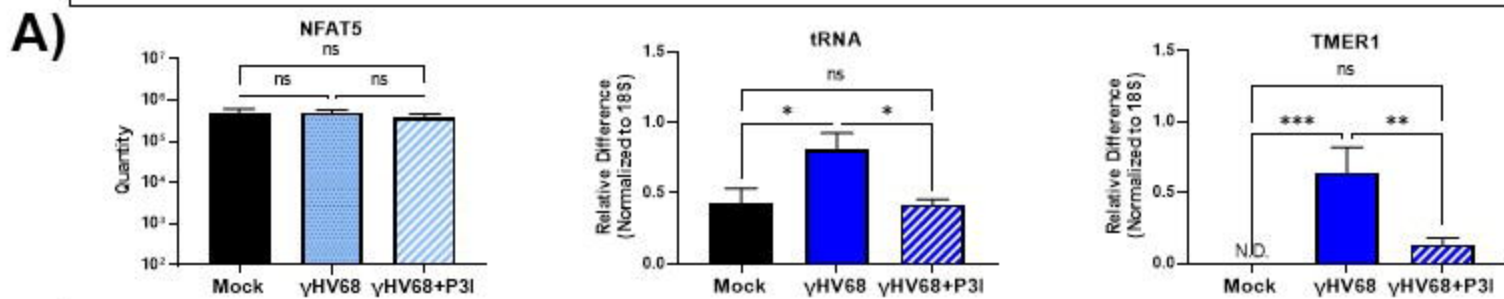

## Pol III Inhibition – Pol II Reporters

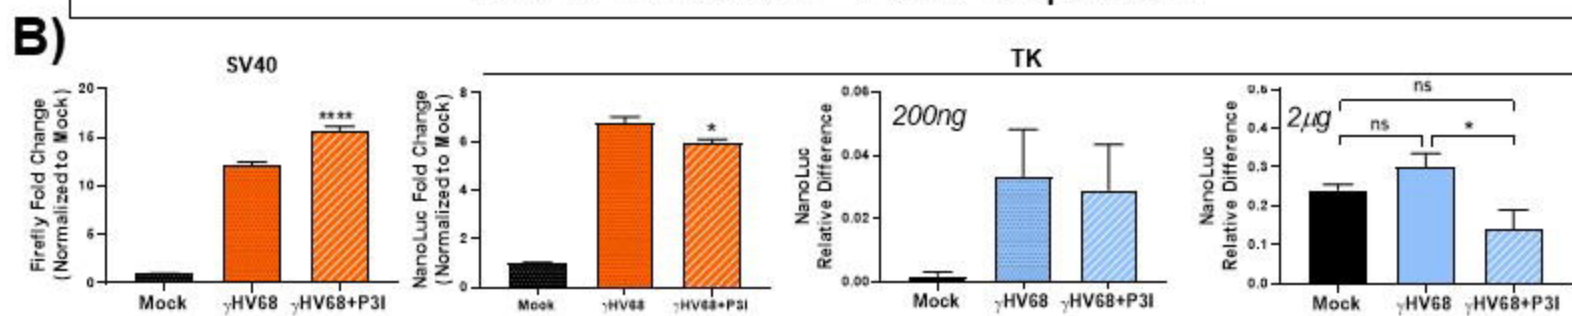

## Pol III Inhibition – Pol III Reporters

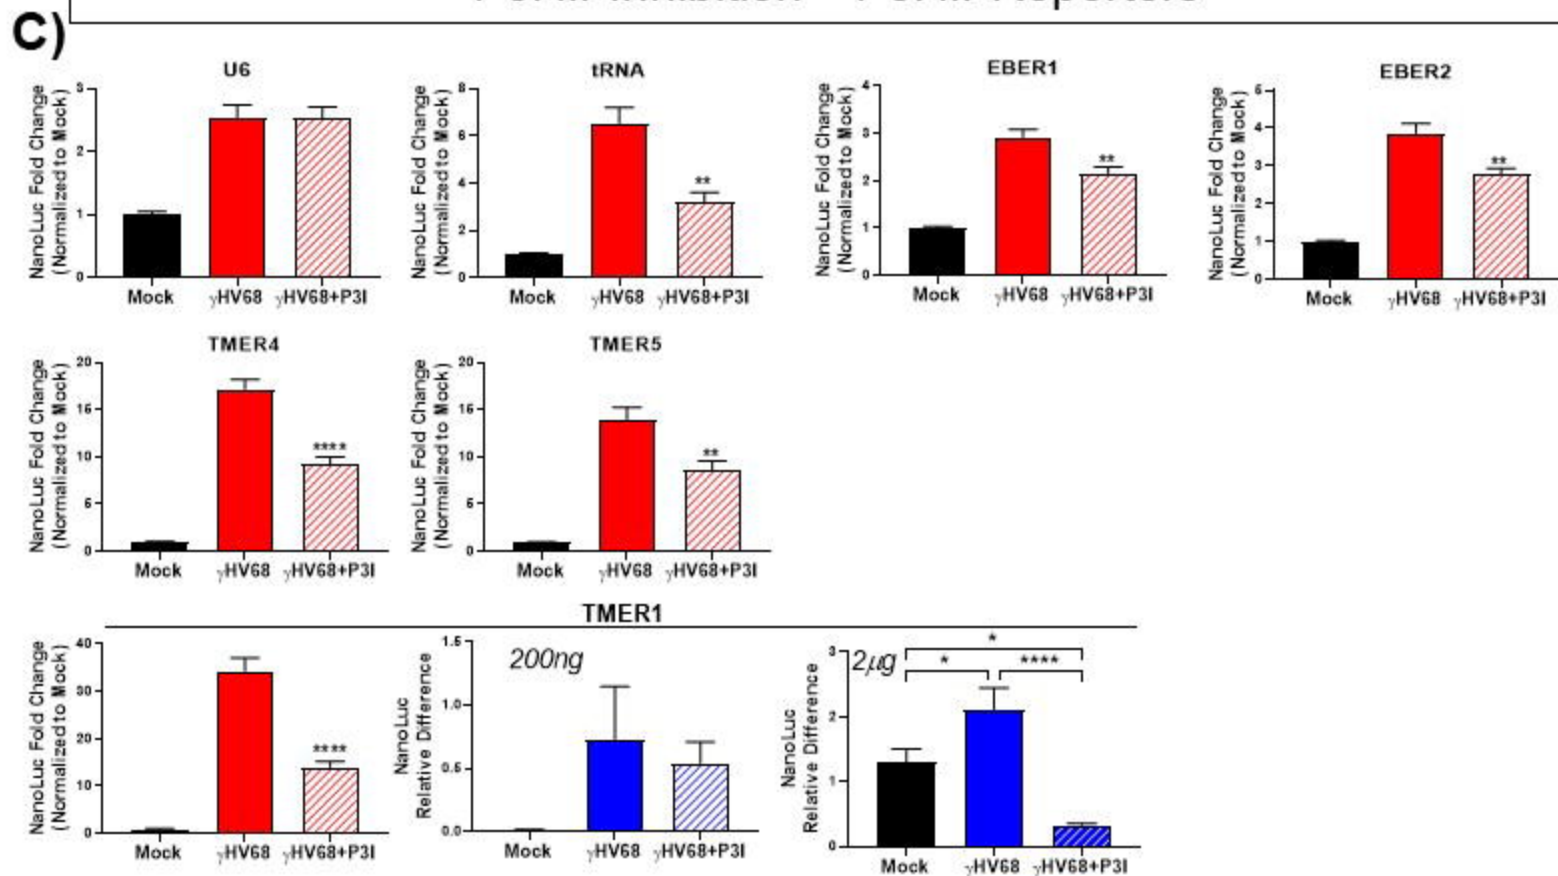

**Fig 3**  
Knox et al

A)

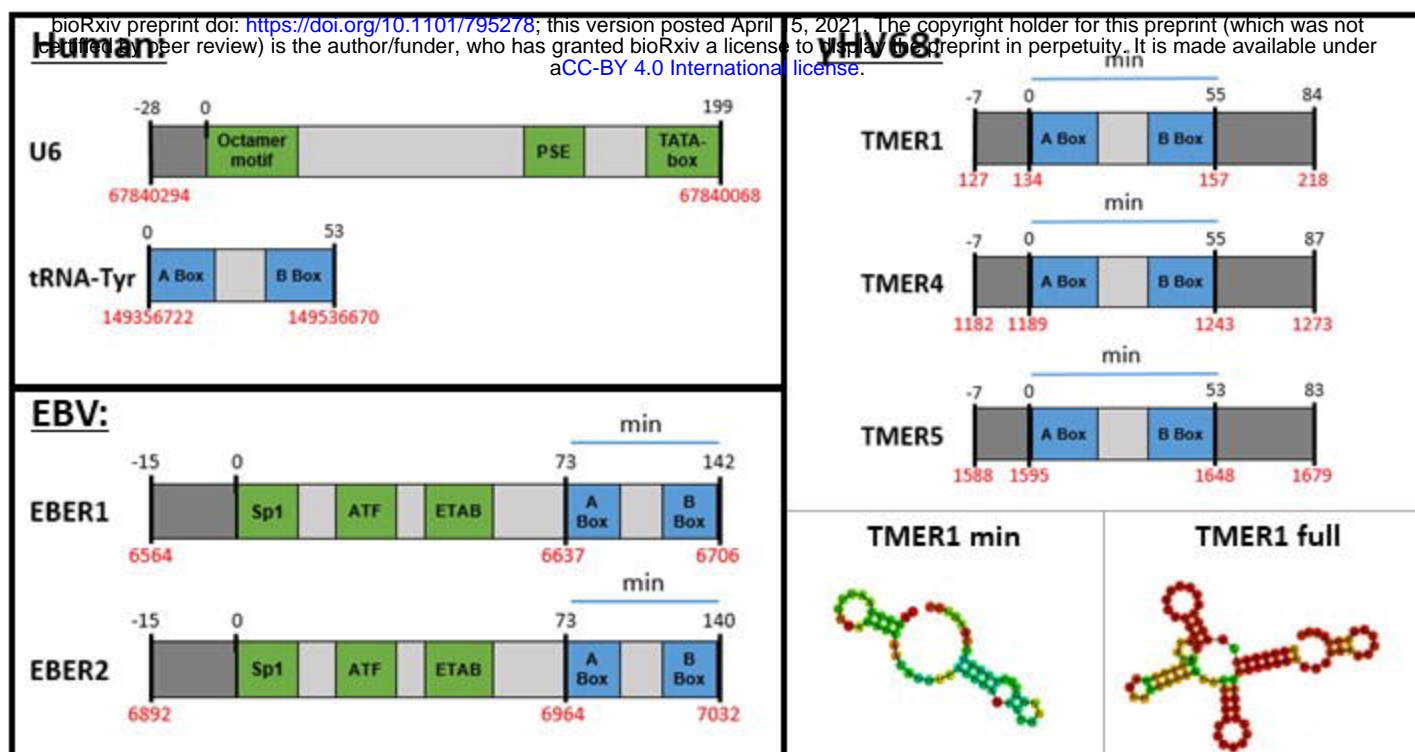

B)

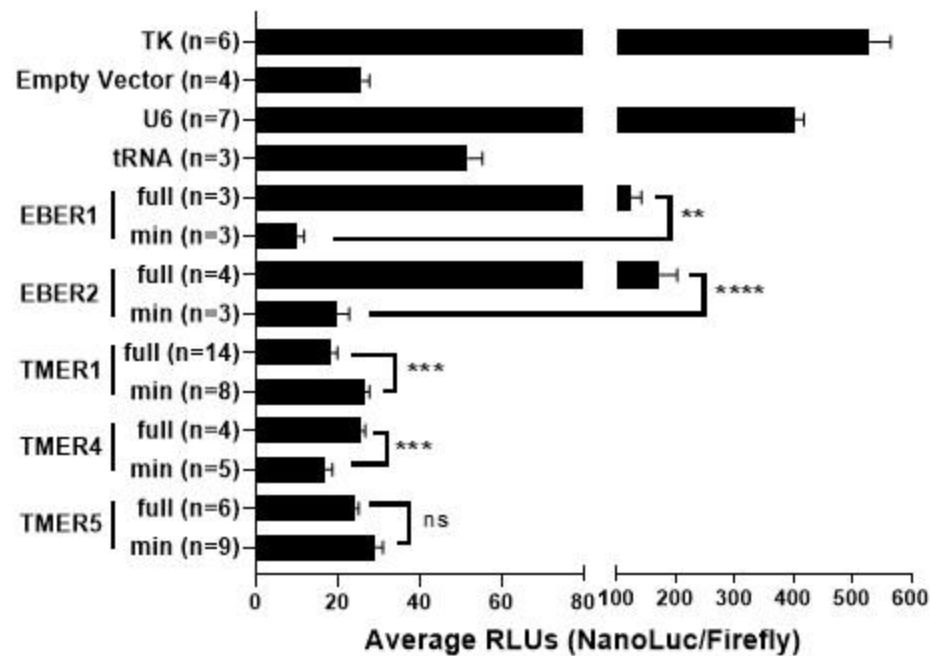

C)

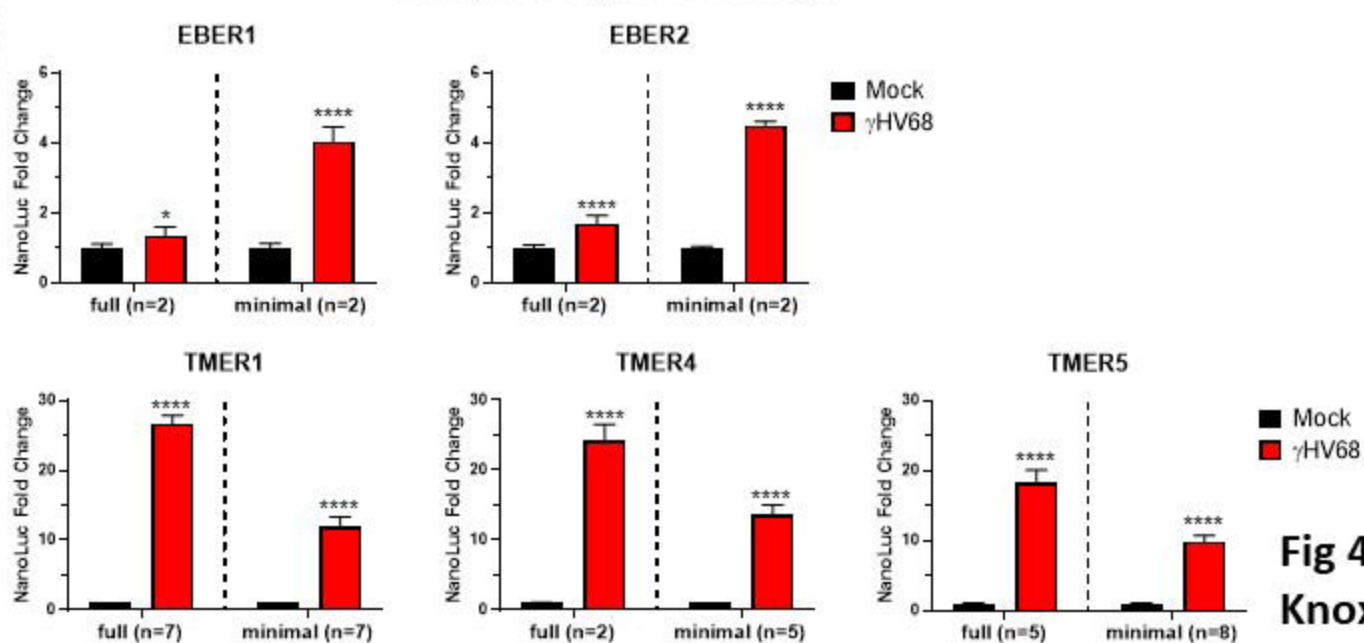

**Fig 4**  
**Knox et al**



## NanoLuc RNA

A)

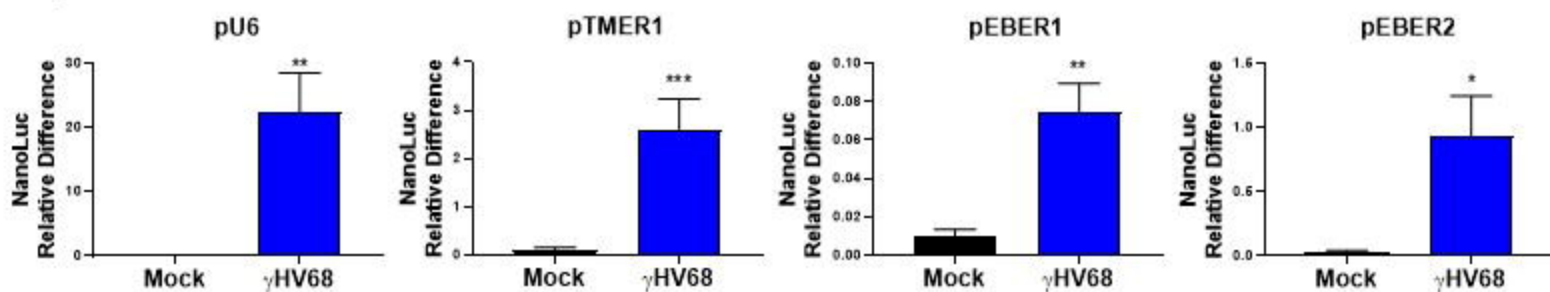

B)

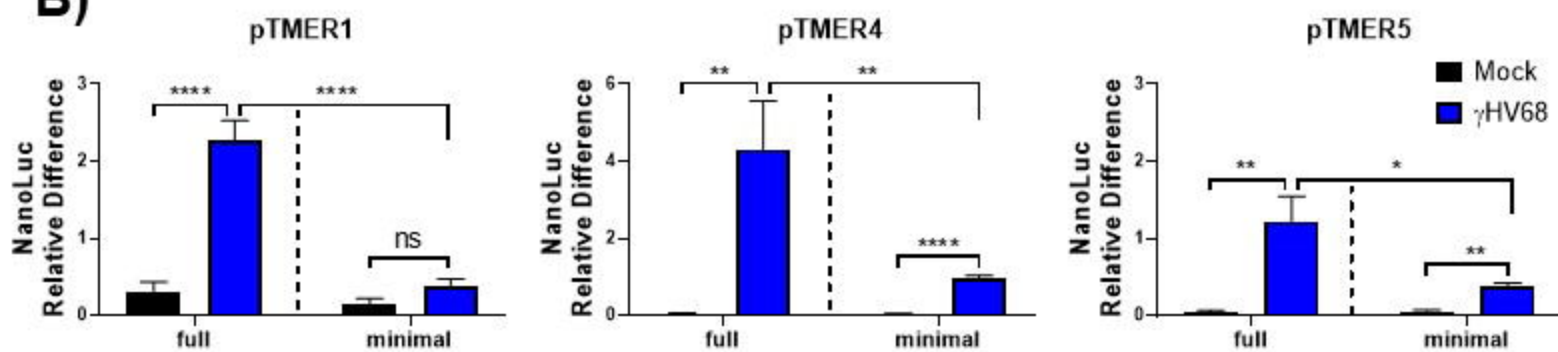

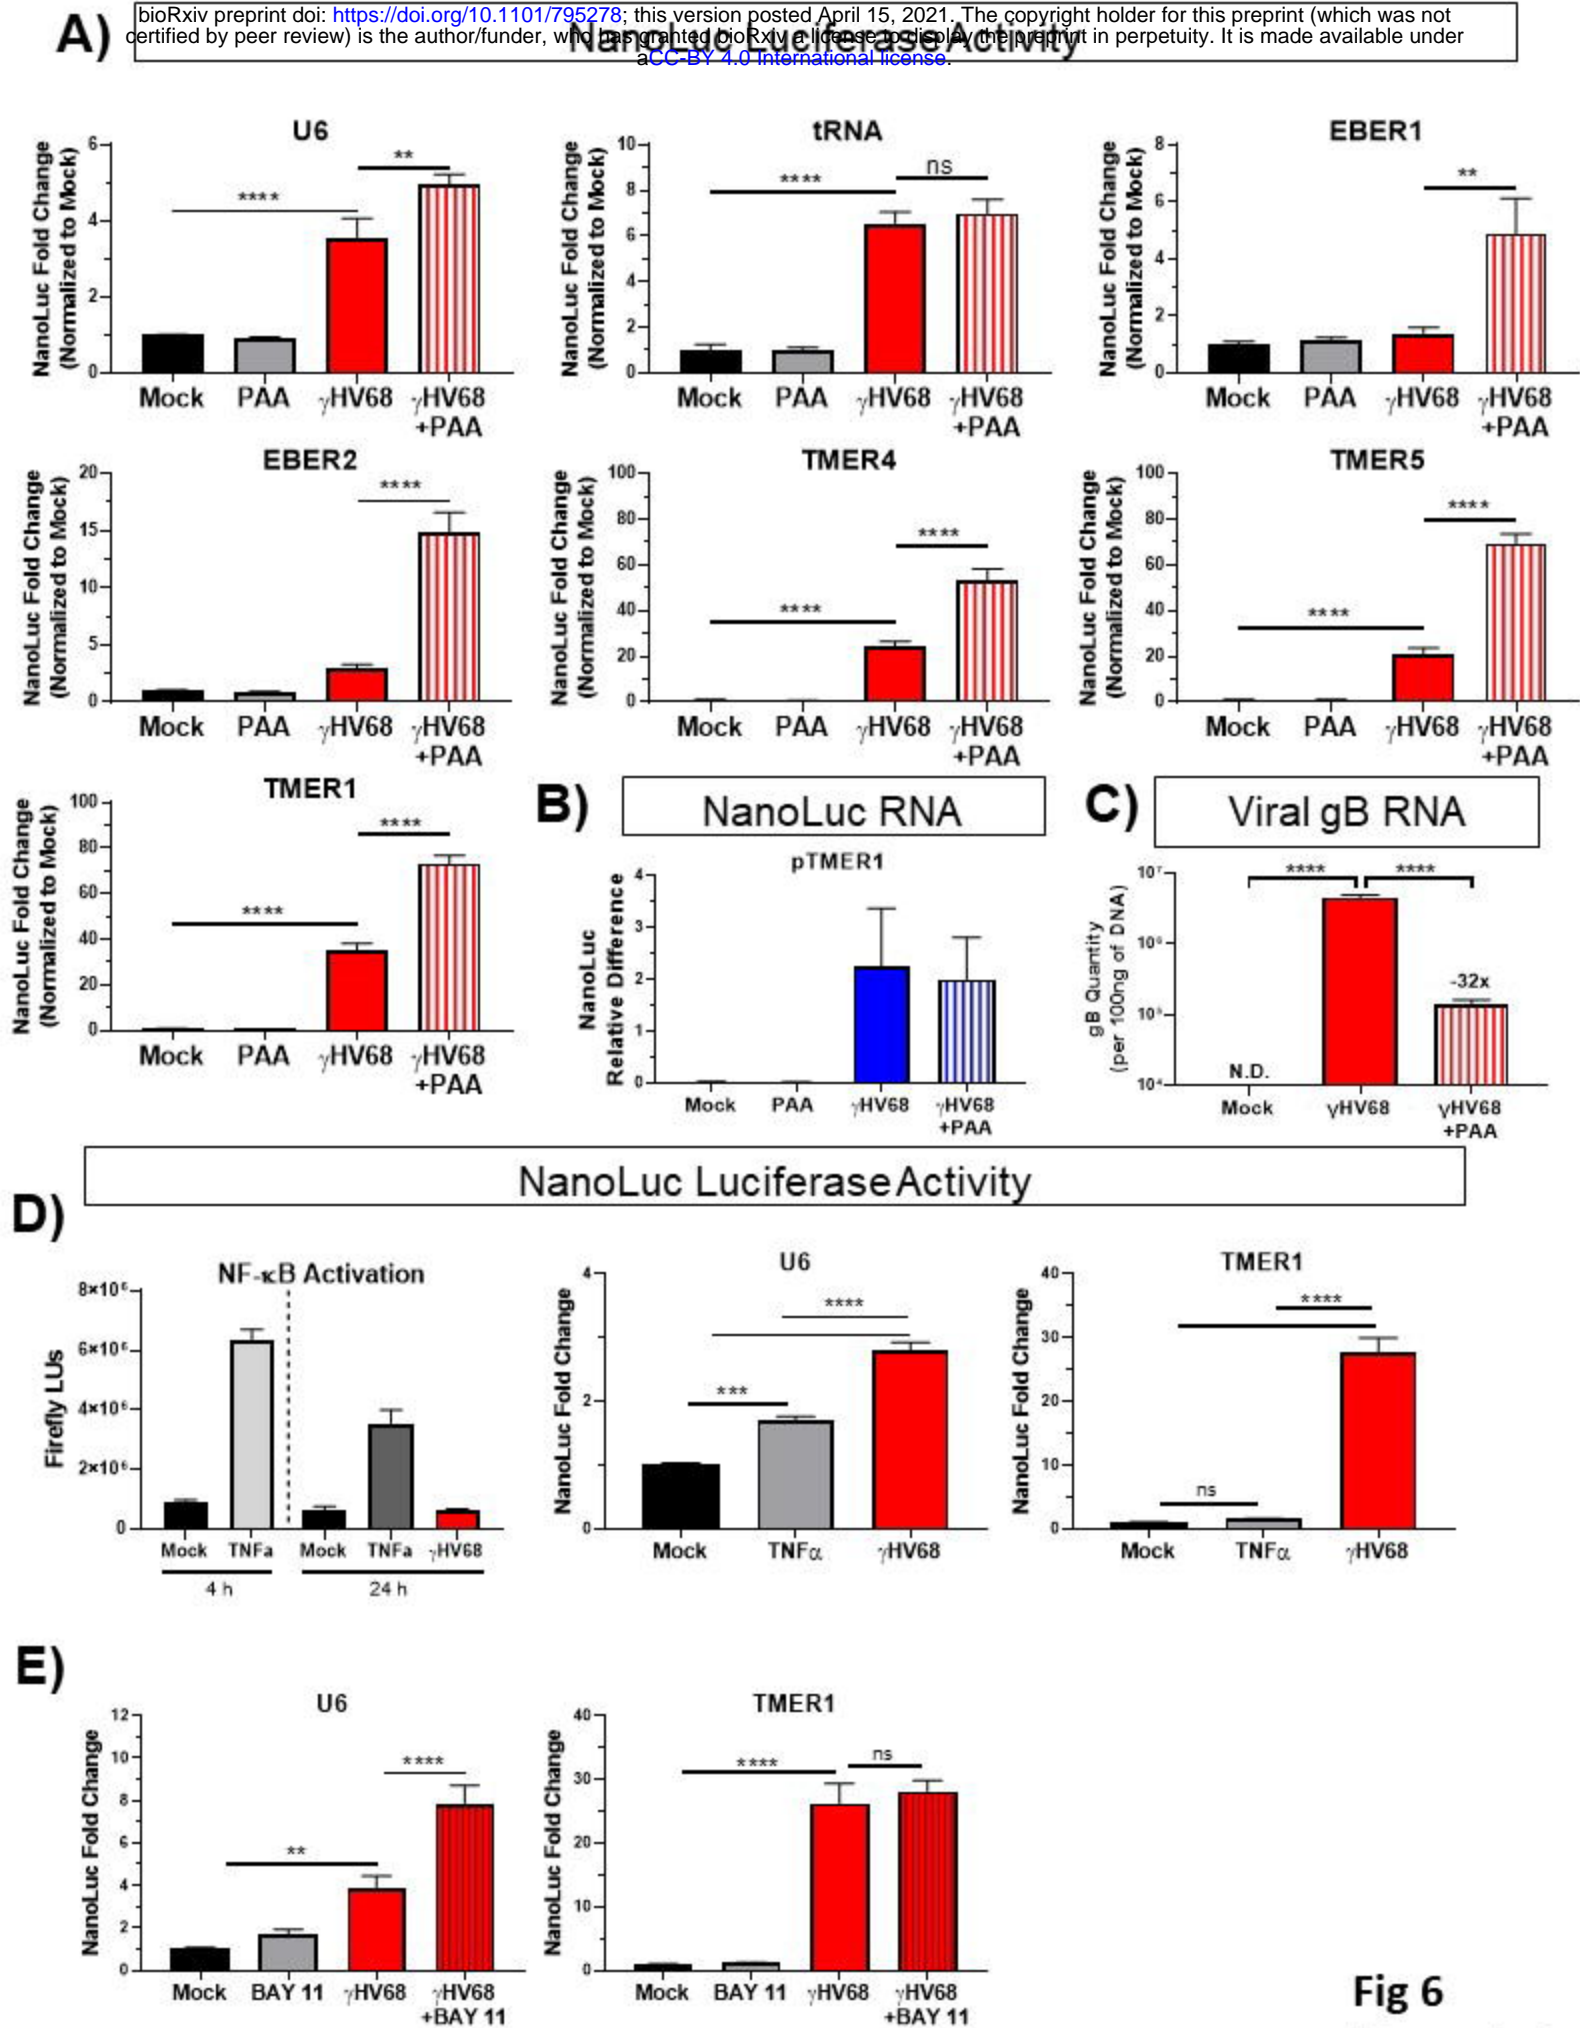

**Fig 6**  
Knox et al

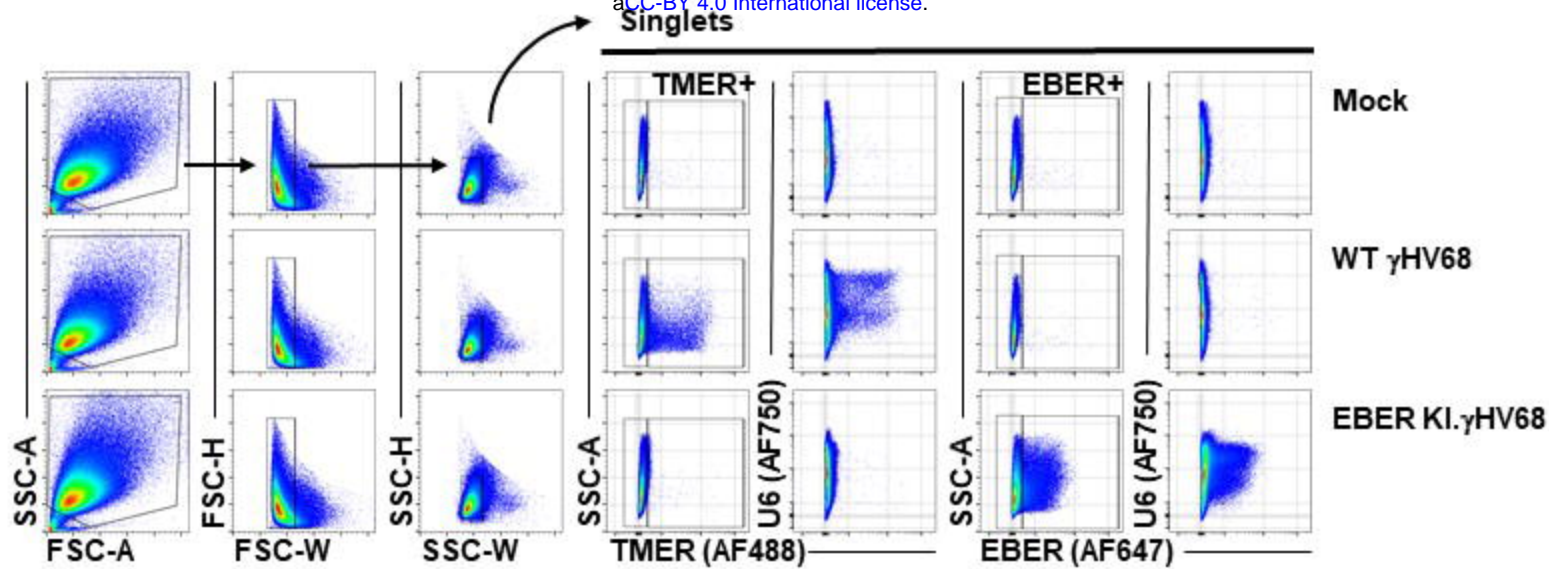

**Fig 7**  
**Knox et al**

Endogenous U6 RNA expression

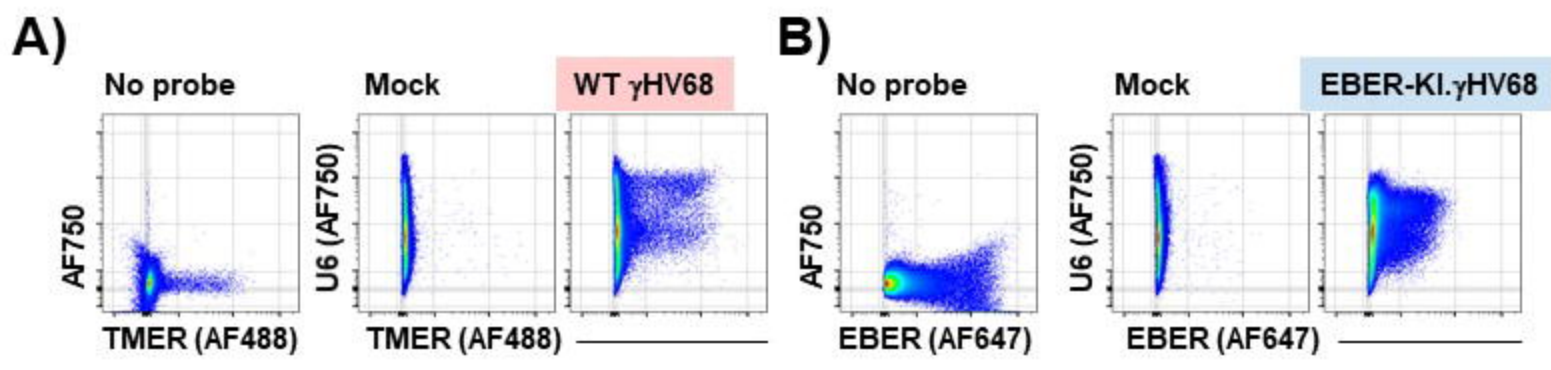

Endogenous 4.5S RNA expression

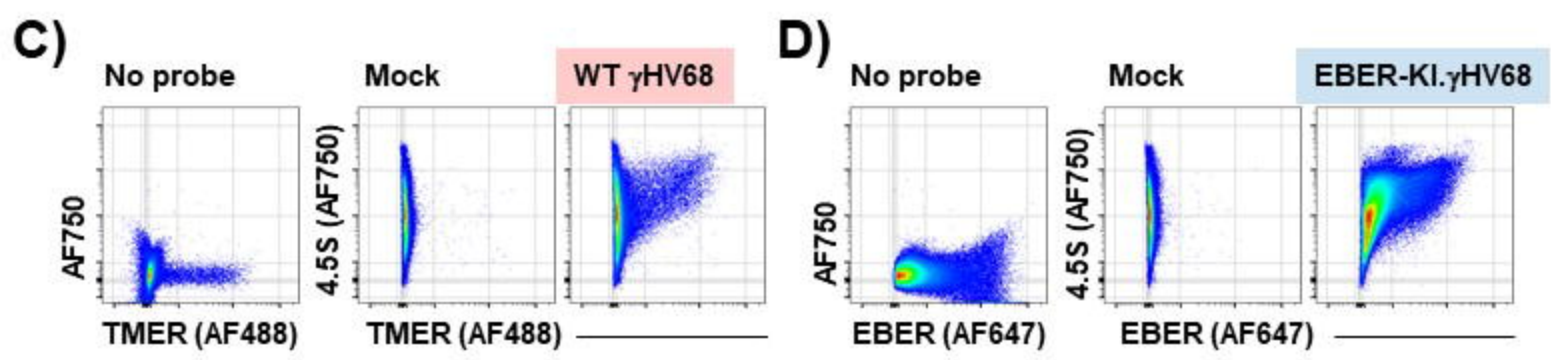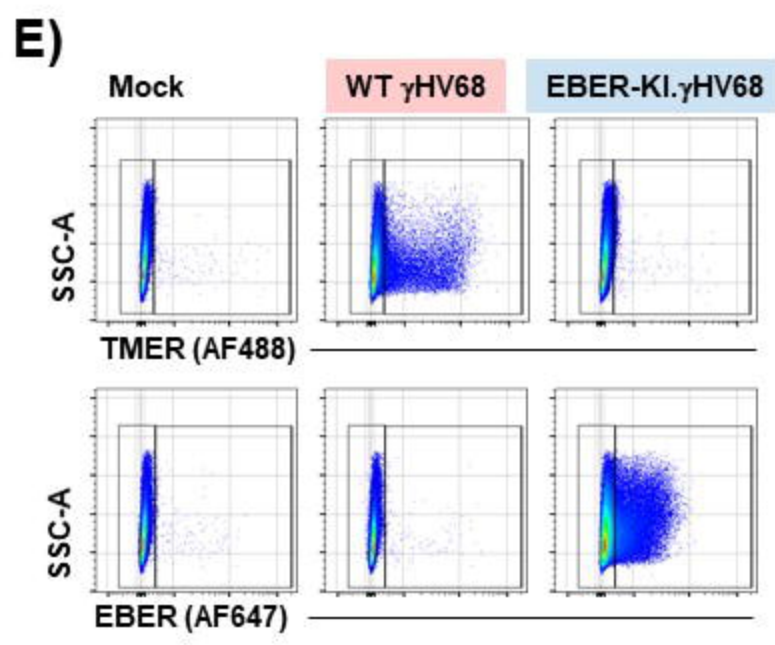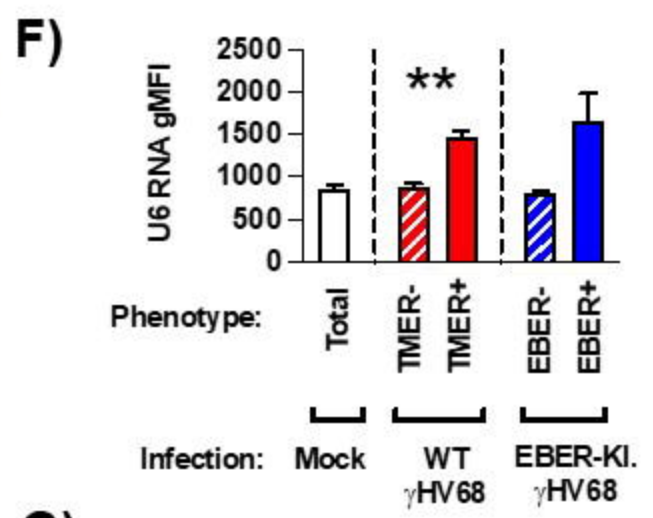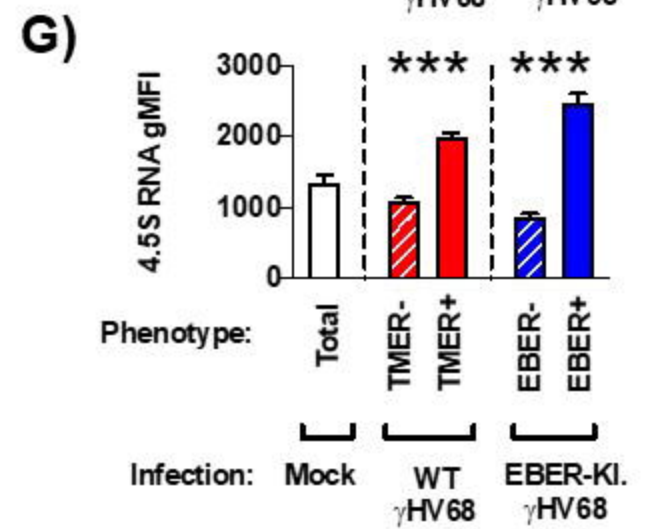

## Endogenous U6 RNA expression

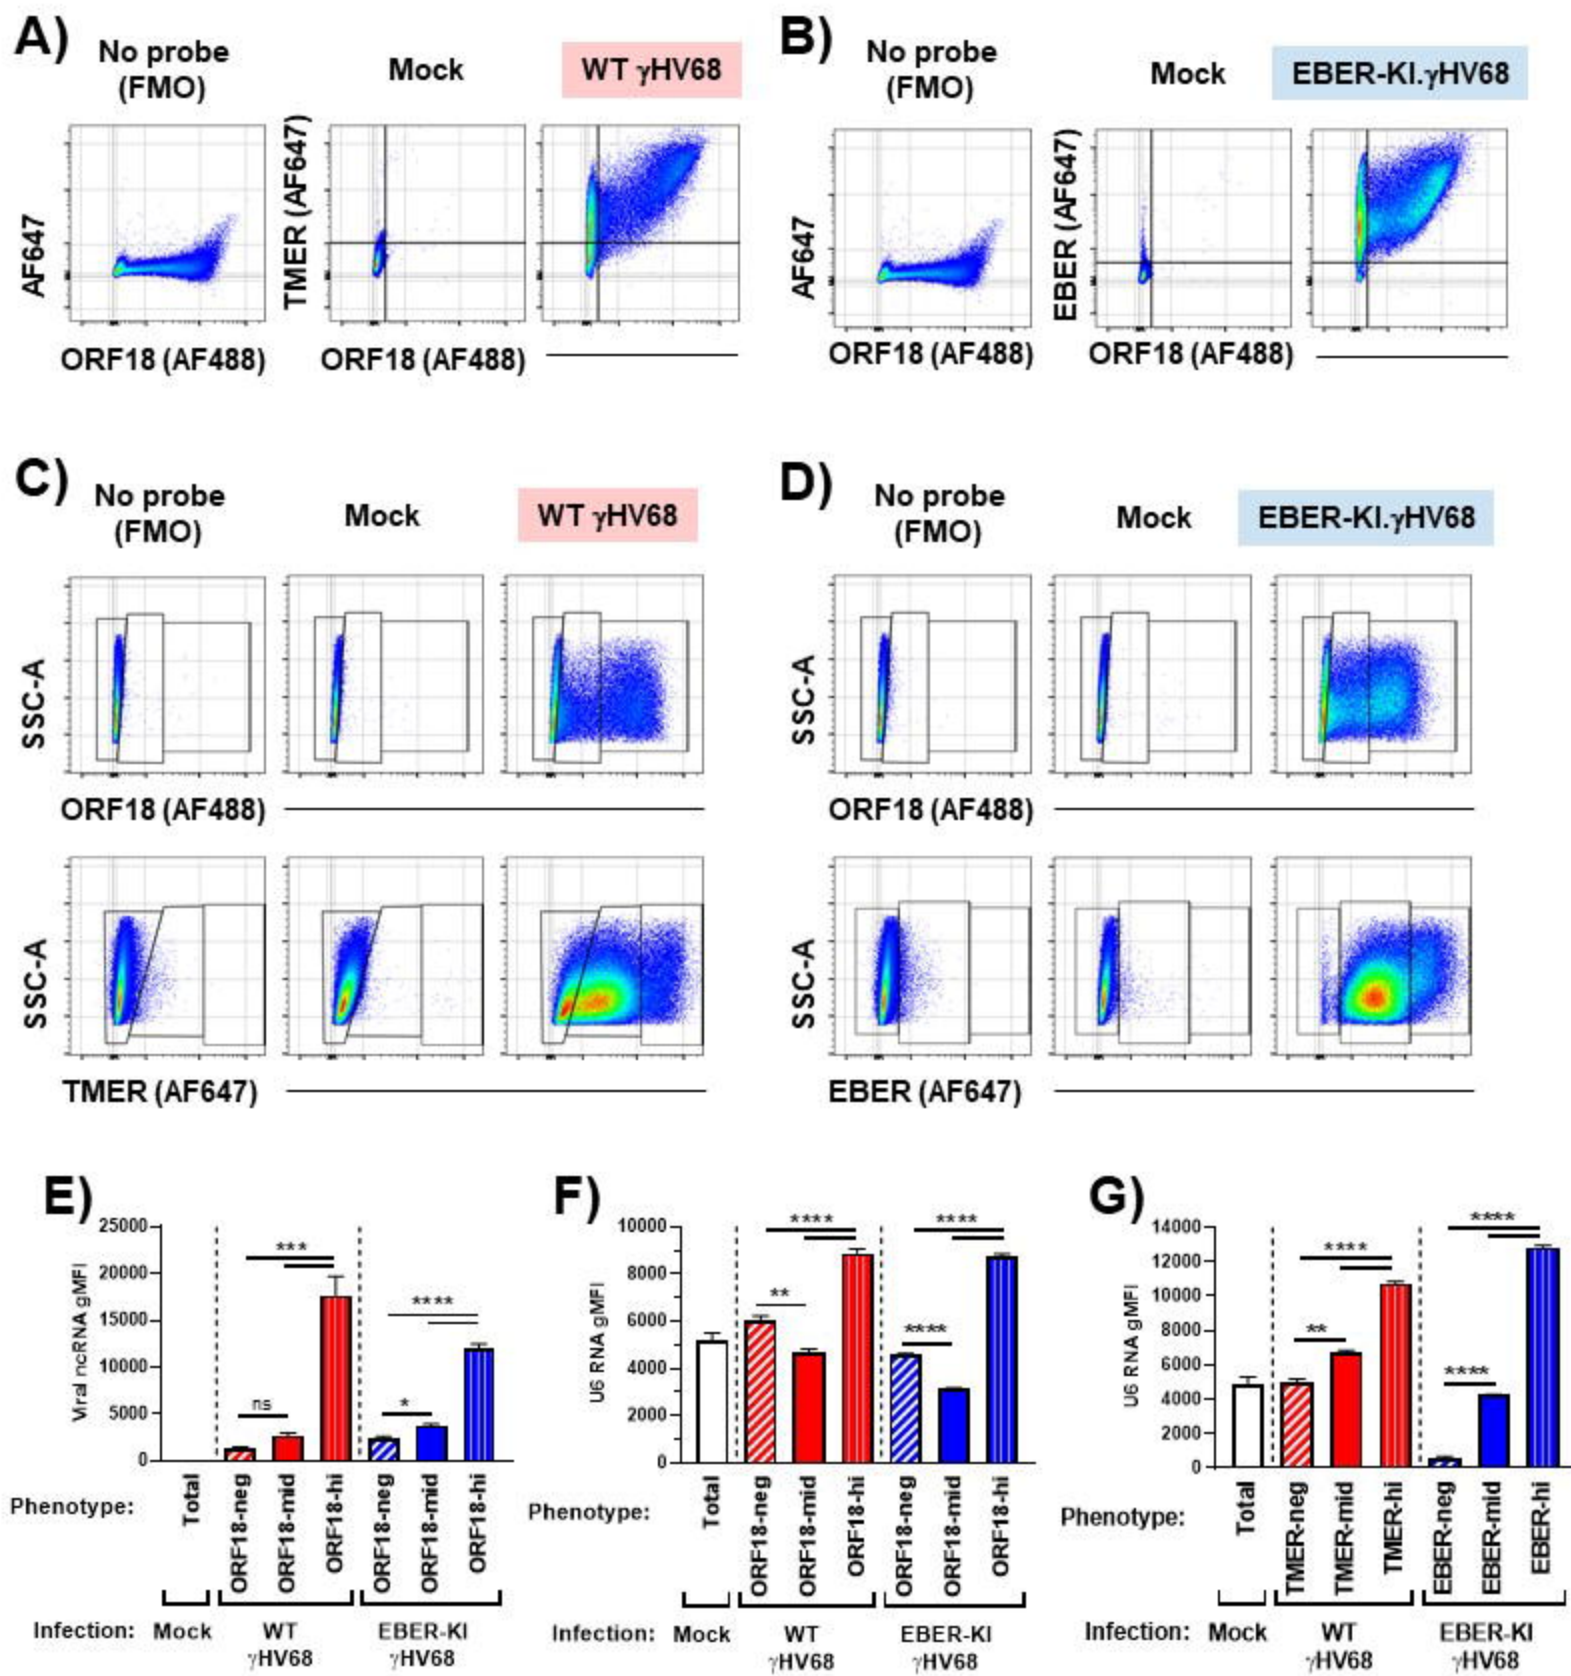

**Fig 9**  
Knox et al
